# Supplementary material for: Cretaceous environmental changes led to high extinction rates in a hyperdiverse beetle family
Source: PubMed Central journal article supplement (PMC4210489; doi:10.1186/s12862-014-0220-1), 2014-10-21

## **Additional figure S1**

Lineages-through-time plots for the four calibration scenarios used in this study.

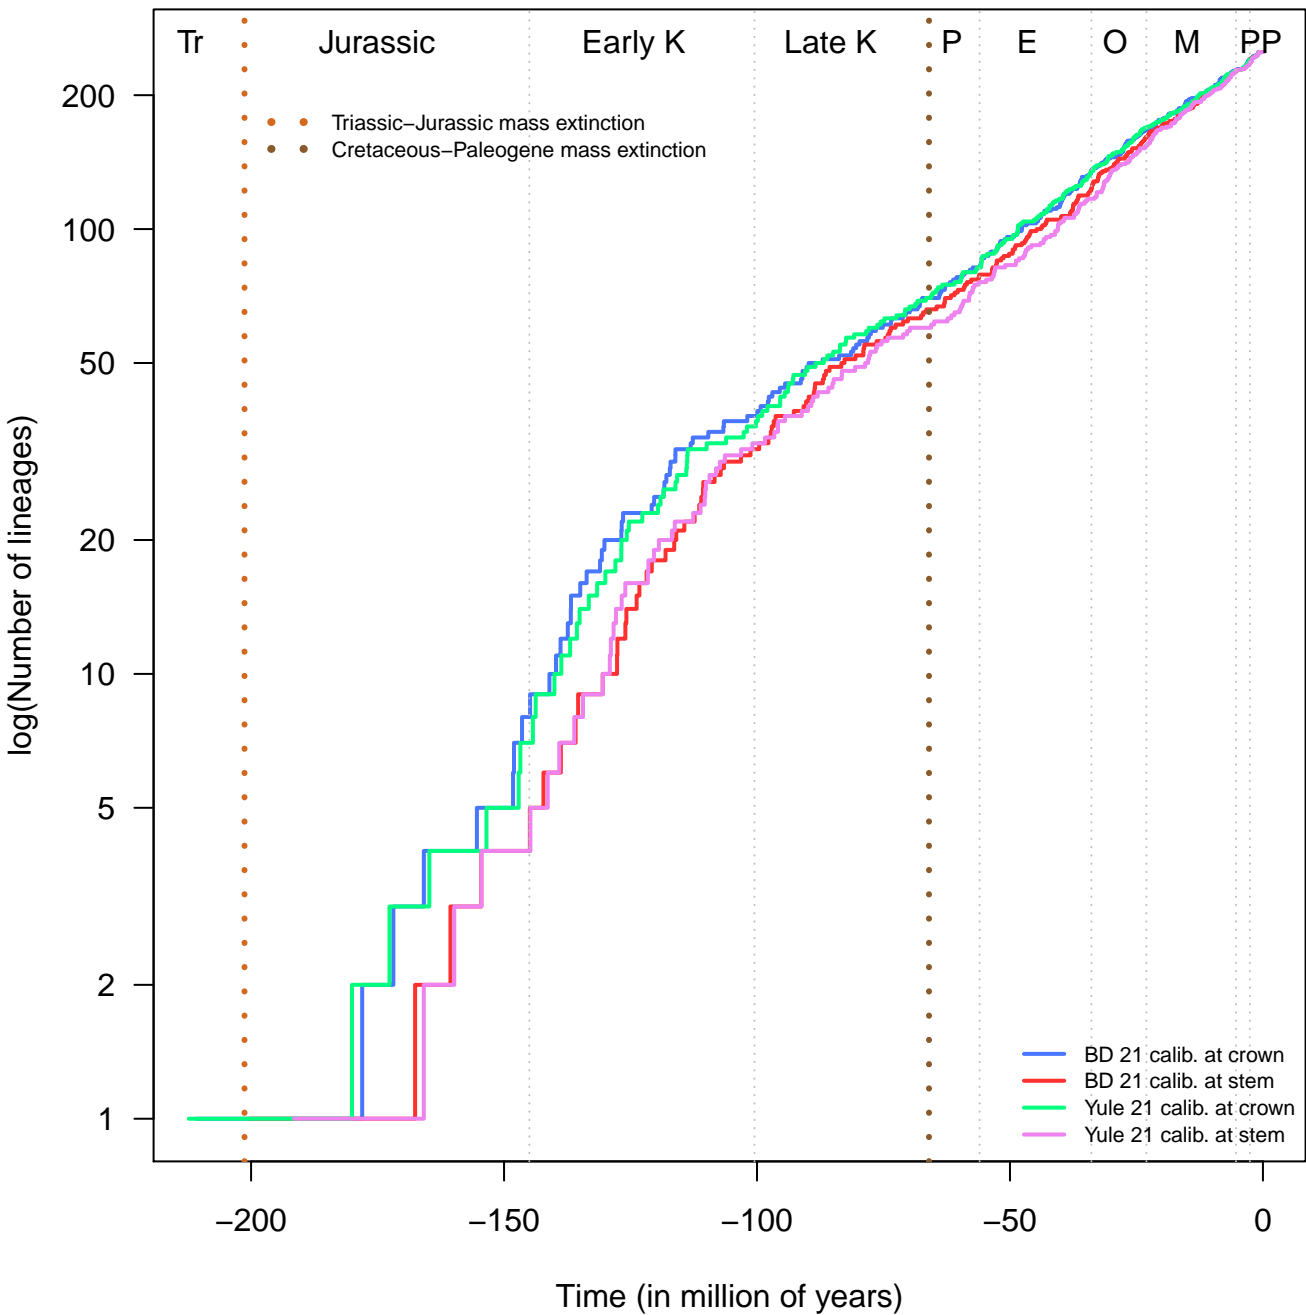

Supplement: 12862_2014_220_MOESM1_ESM.pdf [file 12862_2014_220_MOESM1_ESM.pdf]
