# Supplementary material for: Cretaceous environmental changes led to high extinction rates in a hyperdiverse beetle family
Source: PubMed Central journal article supplement (PMC4210489; doi:10.1186/s12862-014-0220-1), 2014-10-21
Supplement: 12862_2014_220_MOESM2_ESM.pdf [file 12862_2014_220_MOESM2_ESM.pdf]

### Additional Table S1

TreePar diversification analyses: means and standard errors based on the analysis of 500 posterior trees. The best-fit model - as determined by the corrected Akaike information criterion (AICc) and Likelihood ratio tests (LRT) - is the model with one inferred shift time ('1ShiftTime').

| Means (500 trees) |                 |          |                 |                   |               |               |               |               |               |            |          |           |            |          |           |            |          |           |
|-------------------|-----------------|----------|-----------------|-------------------|---------------|---------------|---------------|---------------|---------------|------------|----------|-----------|------------|----------|-----------|------------|----------|-----------|
| Model             | -logL           | n param. | AICc            | P (LRT)           | DivRate1      | Turnover1     | ShiftTime1    | DivRate2      | Turnover2     | ShiftTime2 | DivRate3 | Turnover3 | ShiftTime3 | DivRate4 | Turnover4 | ShiftTime4 | DivRate5 | Turnover5 |
| NoShiftTime       | 1055,796        | 2        | 2115,641        | -                 | 0,0232        | 0,9181        | -             | -             | -             | -          | -        | -         | -          | -        | -         | -          | -        | -         |
| <b>1ShiftTime</b> | <b>1047,161</b> | <b>5</b> | <b>2104,568</b> | <b>&lt;0,0001</b> | <b>0,0200</b> | <b>0,9412</b> | <b>109,71</b> | <b>0,0399</b> | <b>0,7741</b> | -          | -        | -         | -          | -        | -         | -          | -        | -         |
| 2ShiftTimes       | 1044,857        | 8        | 2106,311        | 0,2028            | 0,0211        | 0,9365        | 94,00         | 0,0391        | 0,7638        | 128,77     | 0,0019   | 0,8170    | -          | -        | -         | -          | -        | -         |
| 3ShiftTimes       | 1042,865        | 11       | 2108,84         | 0,1979            | 0,0213        | 0,9356        | 88,73         | 0,0435        | 0,7312        | 109,71     | 0,0342   | 0,7275    | 136,56     | -0,0336  | 0,8674    | -          | -        | -         |
| 4ShiftTimes       | 1041,178        | 14       | 2112,143        | 0,2152            | 0,0213        | 0,9356        | 85,48         | 0,0333        | 0,7265        | 103,72     | 0,0404   | 0,7677    | 120,87     | 0,0360   | 0,7578    | 142,85     | -0,0539  | 0,9013    |

  

| Standard errors (500 trees) |               |          |      |         |               |               |             |               |               |            |          |           |            |          |           |            |          |           |
|-----------------------------|---------------|----------|------|---------|---------------|---------------|-------------|---------------|---------------|------------|----------|-----------|------------|----------|-----------|------------|----------|-----------|
| Model                       | -logL         | n param. | AICc | P (LRT) | DivRate1      | Turnover1     | ShiftTime1  | DivRate2      | Turnover2     | ShiftTime2 | DivRate3 | Turnover3 | ShiftTime3 | DivRate4 | Turnover4 | ShiftTime4 | DivRate5 | Turnover5 |
| NoShiftTime                 | 0,4782        | 2        | -    | -       | 0,0001        | 0,0042        | -           | -             | -             | -          | -        | -         | -          | -        | -         | -          | -        | -         |
| <b>1ShiftTime</b>           | <b>0,2971</b> | <b>5</b> | -    | -       | <b>0,0001</b> | <b>0,0005</b> | <b>1,11</b> | <b>0,0008</b> | <b>0,0123</b> | -          | -        | -         | -          | -        | -         | -          | -        | -         |
| 2ShiftTimes                 | 0,2954        | 8        | -    | -       | 0,0002        | 0,0007        | 1,18        | 0,0053        | 0,0126        | 0,97       | 0,0090   | 0,0183    | -          | -        | -         | -          | -        | -         |
| 3ShiftTimes                 | 0,2983        | 11       | -    | -       | 0,0002        | 0,0007        | 1,18        | 0,0076        | 0,0147        | 1,21       | 0,0069   | 0,0168    | 0,94       | 0,0130   | 0,0155    | -          | -        | -         |
| 4ShiftTimes                 | 0,3016        | 14       | -    | -       | 0,0002        | 0,0007        | 1,16        | 0,0111        | 0,0159        | 1,21       | 0,0082   | 0,0180    | 1,18       | 0,0076   | 0,0173    | 0,94       | 0,0149   | 0,0137    |

### Additional Table S2

TreePar diversification analyses: means and standard errors based on the analysis of 1000 posterior trees.

| Means (1000 trees) |                 |          |                |                |                |                |               |                |                |
|--------------------|-----------------|----------|----------------|----------------|----------------|----------------|---------------|----------------|----------------|
| Model              | -logL           | n param. | AICc           | P (LRT)        | DivRate1       | Turnover1      | ShiftTime1    | DivRate2       | Turnover2      |
| NoShiftTime        | 1055,177        | 2        | 2114,403       | -              | 0,02302        | 0,92494        | -             | -              | -              |
| <b>1ShiftTime</b>  | <b>1047,112</b> | <b>5</b> | <b>2104,47</b> | <b>0,00107</b> | <b>0,02004</b> | <b>0,94119</b> | <b>108,89</b> | <b>0,04002</b> | <b>0,77719</b> |

  

| Standard errors (1000 trees) |                 |          |      |         |                |                |                |                |                |
|------------------------------|-----------------|----------|------|---------|----------------|----------------|----------------|----------------|----------------|
| Model                        | logL            | n param. | AICc | P (LRT) | DivRate1       | Turnover1      | ShiftTime1     | DivRate2       | Turnover2      |
| NoShiftTime                  | 0,252811        | 2        | -    | -       | 5,6E-05        | 0,00156        | -              | -              | -              |
| <b>1ShiftTime</b>            | <b>0,203018</b> | <b>5</b> | -    | -       | <b>7,9E-05</b> | <b>0,00035</b> | <b>0,79126</b> | <b>0,00054</b> | <b>0,00833</b> |
