# Supplementary material for: Cretaceous environmental changes led to high extinction rates in a hyperdiverse beetle family
Source: PubMed Central journal article supplement (PMC4210489; doi:10.1186/s12862-014-0220-1), 2014-10-21
Supplement: 12862_2014_220_MOESM3_ESM.pdf [file 12862_2014_220_MOESM3_ESM.pdf]

### Additional Table S3

Taxon sampling and GenBank accession numbers.

| Systematics                                       | GenBank accession numbers                        |                      |          |           |          |          |          |          |         |          |         |
|---------------------------------------------------|--------------------------------------------------|----------------------|----------|-----------|----------|----------|----------|----------|---------|----------|---------|
|                                                   | Species                                          | Voucher No.          | 12S      | 16S       | Cyt b    | COI      | 28SD2D3  | 28SD4D5  | Wg      | 18S      | 18S*    |
| <b>Superfamily BUPRESTOIDEA Leach, 1815</b>       |                                                  |                      |          |           |          |          |          |          |         |          |         |
| <b>Family BUPRESTIDAE Leach, 1815</b>             |                                                  |                      |          |           |          |          |          |          |         |          |         |
| Genus <i>Agrilus</i> Curtis                       |                                                  |                      |          |           |          |          |          |          |         |          |         |
|                                                   | <i>Agrilus sinuatus</i> (Olivier, 1790)          | <b>BMNH 679189</b>   | AJ965462 | AJ8627310 | missing  | AJ862795 | missing  | missing  | missing | AF451934 | - n/a - |
| Genus <i>Anthaxia</i> Eschscholtz                 |                                                  |                      |          |           |          |          |          |          |         |          |         |
|                                                   | <i>Anthaxia hungarica</i> (Scopoli, 1772)        | <b>UPOL 00M24</b>    | missing  | DQ198623  | missing  | DQ198545 | missing  | DQ198702 | missing | DQ100484 | - n/a - |
| Genus <i>Trachys</i> Fabricius                    |                                                  |                      |          |           |          |          |          |          |         |          |         |
|                                                   | <i>Trachys minutus</i> (Linnaeus, 1758)          | <b>BMNH 679281</b>   | AJ965467 | missing   | missing  | AJ862797 | missing  | DQ198704 | missing | AF451936 | - n/a - |
| <b>Superfamily BYRRHOIDEA Latreille, 1804</b>     |                                                  |                      |          |           |          |          |          |          |         |          |         |
| <b>Family DRYOPIDAE Billberg, 1820</b>            |                                                  |                      |          |           |          |          |          |          |         |          |         |
| Genus <i>Dryops</i> Olivier                       |                                                  |                      |          |           |          |          |          |          |         |          |         |
|                                                   | <i>Dryops costae</i> (Heyden, 1891)              | <b>FC_B14</b>        | missing  | EF209436  | missing  | EF209556 | missing  | missing  | missing | EF209496 | - n/a - |
| Genus <i>Pomatinus</i> Sturm                      |                                                  |                      |          |           |          |          |          |          |         |          |         |
|                                                   | <i>Pomatinus substriatus</i> (Müller, 1806)      | <b>multiple ind.</b> | missing  | DQ198626  | DQ266513 | DQ198549 | missing  | DQ198708 | missing | AF451924 | - n/a - |
| <b>Superfamily CHRYSOMELOIDEA Latreille, 1802</b> |                                                  |                      |          |           |          |          |          |          |         |          |         |
| <b>Family CERAMBYCIDAE Latreille, 1802</b>        |                                                  |                      |          |           |          |          |          |          |         |          |         |
| Genus <i>Agapanthia</i> Serville                  |                                                  |                      |          |           |          |          |          |          |         |          |         |
|                                                   | <i>Agapanthia cardui</i> (Linnaeus, 1767)        | <b>BMNH 704355</b>   | missing  | AJ841405  | missing  | AM283243 | missing  | AJ841656 | missing | AJ841527 | - n/a - |
| Genus <i>Saperda</i> Fabricius                    |                                                  |                      |          |           |          |          |          |          |         |          |         |
|                                                   | <i>Saperda tridentata</i> Olivier, 1795          | <b>BMNH 704357</b>   | missing  | AJ841408  | missing  | AM283246 | missing  | AJ841659 | missing | AJ841530 | - n/a - |
| Genus <i>Tetraopes</i> Schoenherr                 |                                                  |                      |          |           |          |          |          |          |         |          |         |
|                                                   | <i>Tetraopes tetraophthalmus</i> (Forster, 1771) | <b>multiple ind.</b> | missing  | missing   | missing  | AF267478 | FJ000429 | missing  | missing | FJ000505 | - n/a - |
| Genus <i>Titanus</i> Audinet-Serville             |                                                  |                      |          |           |          |          |          |          |         |          |         |
|                                                   | <i>Titanus giganteus</i> (Linnaeus, 1771)        | <b>none</b>          | missing  | AJ841414  | missing  | missing  | missing  | AJ841668 | missing | AJ841539 | - n/a - |
| <b>Family CHRYSOMELIDAE Latreille, 1802</b>       |                                                  |                      |          |           |          |          |          |          |         |          |         |

|                                                    |                      |         |          |         |          |          |         |         |         |          |         |
|----------------------------------------------------|----------------------|---------|----------|---------|----------|----------|---------|---------|---------|----------|---------|
| Genus <i>Calligrapha</i> Chevrolat                 |                      |         |          |         |          |          |         |         |         |          |         |
| <i>Calligrapha multipunctata</i> (Say, 1824)       | <b>BMNH 704370</b>   | missing | AJ841303 | missing | AM283119 | missing  | missing | missing | missing | AJ841419 | - n/a - |
| Genus <i>Chrysolina</i> Motschulsky                |                      |         |          |         |          |          |         |         |         |          |         |
| <i>Chrysolina hyperici</i> (Forster, 1771)         | <b>BMNH 679269</b>   | missing | AF097090 | missing | DQ222025 | missing  | missing | missing | missing | AY748121 | - n/a - |
| Genus <i>Diabrotica</i> Dejean                     |                      |         |          |         |          |          |         |         |         |          |         |
| <i>Diabrotica undecimpunctata</i> Mannerheim, 1843 | <b>BMNH 704464</b>   | missing | AJ781555 | missing | AM283202 | missing  | missing | missing | missing | AJ781618 | - n/a - |
| Genus <i>Gonioctena</i> Motschulsky                |                      |         |          |         |          |          |         |         |         |          |         |
| <i>Gonioctena olivacea</i> (Forster, 1771)         | <b>multiple ind.</b> | missing | AJ841310 | missing | AY904888 | missing  | missing | missing | missing | AJ622061 | - n/a - |
| Genus <i>Pyrrhalta</i> Joannis                     |                      |         |          |         |          |          |         |         |         |          |         |
| <i>Pyrrhalta viburni</i> (Paykull, 1799)           | <b>BMNH 704474</b>   | missing | AJ841378 | missing | AM283212 | missing  | missing | missing | missing | AJ841497 | - n/a - |
| Genus <i>Timarcha</i> Latreille                    |                      |         |          |         |          |          |         |         |         |          |         |
| <i>Timarcha tenebricosa</i> (Fabricius, 1775)      | <b>multiple ind.</b> | missing | AJ231158 | missing | AJ171412 | FJ000452 | missing | missing | missing | FJ000528 | - n/a - |

### Superfamily CLEROIDEA Latreille, 1802

#### Family CLERIDAE Latreille, 1802

|                                           |                    |         |          |         |          |         |         |         |         |          |         |
|-------------------------------------------|--------------------|---------|----------|---------|----------|---------|---------|---------|---------|----------|---------|
| Genus <i>Clerus</i> Geoffroy              |                    |         |          |         |          |         |         |         |         |          |         |
| <i>Clerus mutillarius</i> Fabricius, 1775 | <b>UPOL 001124</b> | missing | EF508043 | missing | EF508056 | missing | missing | missing | missing | EF209691 | - n/a - |

#### Family MELYRIDAE Leach, 1815

|                                                 |                    |         |          |         |          |         |         |         |         |          |         |
|-------------------------------------------------|--------------------|---------|----------|---------|----------|---------|---------|---------|---------|----------|---------|
| Genus <i>Aplocnemus</i> Stephens                |                    |         |          |         |          |         |         |         |         |          |         |
| <i>Aplocnemus</i> sp.                           | <b>UPOL 001073</b> | missing | EF508037 | missing | EF508050 | missing | missing | missing | missing | EF209702 | - n/a - |
| Genus <i>Carphurus</i> Erichson                 |                    |         |          |         |          |         |         |         |         |          |         |
| <i>Carphurus</i> sp.                            | <b>UPOL 001116</b> | missing | EF508040 | missing | EF508053 | missing | missing | missing | missing | EF209731 | - n/a - |
| Genus <i>Falsomelyris</i> Pic                   |                    |         |          |         |          |         |         |         |         |          |         |
| <i>Falsomelyris granulata</i> (Fabricius, 1792) | <b>UPOL 001077</b> | missing | EF508038 | missing | EF508051 | missing | missing | missing | missing | EF209700 | - n/a - |

#### Family PRIONOCERIDAE Lacordaire, 1857

|                            |                    |         |          |         |          |         |          |         |         |          |         |
|----------------------------|--------------------|---------|----------|---------|----------|---------|----------|---------|---------|----------|---------|
| Genus <i>Idgia</i> Laporte |                    |         |          |         |          |         |          |         |         |          |         |
| <i>Idgia</i> sp.           | <b>UPOL ZL0103</b> | missing | EF490157 | missing | EF490157 | missing | FJ903952 | missing | missing | EF209685 | - n/a - |

#### Family TROGOSSITIDAE Latreille, 1802

|                                            |                    |         |          |         |          |         |         |         |         |          |         |
|--------------------------------------------|--------------------|---------|----------|---------|----------|---------|---------|---------|---------|----------|---------|
| Genus <i>Temnoscheila</i> Westwood         |                    |         |          |         |          |         |         |         |         |          |         |
| <i>Temnoscheila japonica</i> Reitter, 1875 | <b>UPOL 001118</b> | missing | EF508041 | missing | EF508054 | missing | missing | missing | missing | EF209679 | - n/a - |

### Superfamily CUCUJOIDEA Latreille, 1802

#### Family ALEXIIDAE Imhoff, 1856

|                                            |                    |         |          |         |          |         |         |         |         |          |         |
|--------------------------------------------|--------------------|---------|----------|---------|----------|---------|---------|---------|---------|----------|---------|
| Genus <i>Sphaerosoma</i> Samouelle         |                    |         |          |         |          |         |         |         |         |          |         |
| <i>Sphaerosoma quercus</i> Samouelle, 1819 | <b>BMNH 675565</b> | missing | EF512337 | missing | DQ155803 | missing | missing | missing | missing | EF362957 | - n/a - |

#### Family BIPHYLIDAE LeConte, 1861

|                                                                                         |             |         |          |         |          |         |         |          |         |          |         |
|-----------------------------------------------------------------------------------------|-------------|---------|----------|---------|----------|---------|---------|----------|---------|----------|---------|
| Genus <i>Biphyllus</i> Dejean<br><i>Biphyllus lunatus</i> (Fabricius, 1792)             | BMNH 679141 | missing | DQ202525 | missing | missing  | missing | missing | DQ202625 | missing | AY748139 | - n/a - |
| <b>Family BOTHRIDERIDAE Erichson, 1845</b>                                              |             |         |          |         |          |         |         |          |         |          |         |
| Genus <i>Xylariophilus</i> Pal & Lawrence<br><i>Xylariophilus</i> sp.                   | UPOL ZL0152 | missing | EF490158 | missing | EF490188 | missing | missing | FJ903953 | missing | EF209827 | - n/a - |
| <b>Family BYTURIDAE Gistel, 1848</b>                                                    |             |         |          |         |          |         |         |          |         |          |         |
| Genus <i>Byturus</i> Latreille<br><i>Byturus ochraceus</i> (Scriba, 1790)               | UPOL 002071 | missing | missing  | missing | missing  | missing | missing | missing  | missing | EF209816 | - n/a - |
| <b>Family CEROLYNIDAE Billberg, 1820</b>                                                |             |         |          |         |          |         |         |          |         |          |         |
| Genus <i>Philothermus</i> Aubé<br><i>Philothermus</i> sp.                               | UPOL 002267 | missing | missing  | missing | missing  | missing | missing | missing  | missing | EF209834 | - n/a - |
| <b>Family COCCINELLIDAE Latreille, 1807</b>                                             |             |         |          |         |          |         |         |          |         |          |         |
| Genus <i>Coccinella</i> Linnaeus<br><i>Coccinella septempunctata</i> Linnaeus, 1758     | BMNH 679320 | missing | missing  | missing | missing  | missing | missing | missing  | missing | AY748147 | - n/a - |
| Genus <i>Psyllobora</i> Dejean<br><i>Psyllobora vigintiduopunctata</i> (Linnaeus, 1758) | UPOL 002134 | missing | missing  | missing | missing  | missing | missing | missing  | missing | EF209854 | - n/a - |
| <b>Family CUCUJIDAE Latreille, 1802</b>                                                 |             |         |          |         |          |         |         |          |         |          |         |
| Genus <i>Cucujus</i> Fabricius<br><i>Cucujus mniszehci</i> Grouvelle, 1874              | UPOL 002084 | missing | missing  | missing | missing  | missing | missing | missing  | missing | EF209775 | - n/a - |
| <b>Family ENDOMYCHIDAE Leach, 1815</b>                                                  |             |         |          |         |          |         |         |          |         |          |         |
| Genus <i>Mycetina</i> Mulsant<br><i>Mycetina</i> sp.                                    | UPOL 002083 | missing | missing  | missing | missing  | missing | missing | missing  | missing | EF209845 | - n/a - |
| <b>Family EROTYLIDAE Latreille, 1802</b>                                                |             |         |          |         |          |         |         |          |         |          |         |
| Genus <i>Tetraphala</i> Chevrolat<br><i>Tetraphala</i> sp.                              | UPOL 002092 | missing | missing  | missing | missing  | missing | missing | missing  | missing | EF209803 | - n/a - |
| <b>Family HELOTIDAE Chapuis, 1876</b>                                                   |             |         |          |         |          |         |         |          |         |          |         |
| Genus <i>Helota</i> MacLeay<br><i>Helota gemmata</i> Gorham, 1874                       | UPOL 002090 | missing | missing  | missing | missing  | missing | missing | missing  | missing | EF209758 | - n/a - |
| <b>Family PASSANDRIDAE Blanchard, 1845</b>                                              |             |         |          |         |          |         |         |          |         |          |         |
| Genus <i>Hectarthrum</i> Newman<br><i>Hectarthrum</i> sp.                               | UPOL 002089 | missing | missing  | missing | missing  | missing | missing | missing  | missing | EF209773 | - n/a - |

|                                                   |         |          |          |          |          |          |         |         |          |          |         |
|---------------------------------------------------|---------|----------|----------|----------|----------|----------|---------|---------|----------|----------|---------|
| <b>Family SILVANIDAE Kirby, 1837</b>              |         |          |          |          |          |          |         |         |          |          |         |
| Genus <i>Dendrophagus</i> Schoenherr              |         |          |          |          |          |          |         |         |          |          |         |
| <i>Dendrophagus</i> sp.                           |         |          |          |          |          |          |         |         |          |          |         |
| UPOL ZL0213                                       | missing | missing  | missing  | missing  | missing  | missing  | missing | missing | missing  | EF209768 | - n/a - |
| <b>Superfamily CURCULIONOIDEA Latreille, 1802</b> |         |          |          |          |          |          |         |         |          |          |         |
| <b>Family ANTHRIBIDAE Billberg, 1820</b>          |         |          |          |          |          |          |         |         |          |          |         |
| Genus <i>Urodontus</i> Louw                       |         |          |          |          |          |          |         |         |          |          |         |
| <i>Urodontus mesemoides</i> (Louw, 1993)          |         |          |          |          |          |          |         |         |          |          |         |
| BToLDDM0067                                       | missing | missing  | missing  | FJ867818 | FJ867725 | FJ867725 | missing | missing | FJ867802 | - n/a -  |         |
| <b>Family BRENTIDAE Billberg, 1820</b>            |         |          |          |          |          |          |         |         |          |          |         |
| Genus <i>Cylas</i> Latreille                      |         |          |          |          |          |          |         |         |          |          |         |
| <i>Cylas formicarius</i> (Fabricius, 1798)        |         |          |          |          |          |          |         |         |          |          |         |
| multiple ind.                                     | missing | missing  | missing  | FJ867849 | FJ867676 | FJ86767  | missing | missing | AF515703 | - n/a -  |         |
| <b>Family CURCULIONIDAE Latreille, 1802</b>       |         |          |          |          |          |          |         |         |          |          |         |
| Genus <i>Curculio</i> Linnaeus                    |         |          |          |          |          |          |         |         |          |          |         |
| <i>Curculio glandium</i> Marsham, 1802            |         |          |          |          |          |          |         |         |          |          |         |
| multiple ind.                                     | missing | AJ495529 | AY327749 | AY327713 | missing  | missing  | missing | missing | AJ850003 | - n/a -  |         |
| Genus <i>Tanyosphyrus</i> Germar                  |         |          |          |          |          |          |         |         |          |          |         |
| <i>Tanyosphyrus lemnae</i> (Fabricius, 1792)      |         |          |          |          |          |          |         |         |          |          |         |
| BMNH 676138                                       | missing | missing  | missing  | DQ155948 | missing  | missing  | missing | missing | AJ850023 | - n/a -  |         |
| <b>Family NEMONYCHIDAE Bedel, 1882</b>            |         |          |          |          |          |          |         |         |          |          |         |
| Genus <i>Cimberis</i> Gozis                       |         |          |          |          |          |          |         |         |          |          |         |
| <i>Cimberis pilosa</i> (LeConte, 1876)            |         |          |          |          |          |          |         |         |          |          |         |
| BToLDDM0147                                       | missing | missing  | missing  | FJ867848 | FJ867673 | FJ867673 | missing | missing | FJ867746 | - n/a -  |         |
| Genus <i>Rhynchitomacerinus</i> Kuschel           |         |          |          |          |          |          |         |         |          |          |         |
| <i>Rhynchitomacerinus kuscheli</i> (Voss, 1952)   |         |          |          |          |          |          |         |         |          |          |         |
| multiple ind.                                     | missing | missing  | missing  | FJ867805 | FJ867708 | FJ867708 | missing | missing | AJ850034 | - n/a -  |         |
| <b>Superfamily ELATEROIDEA Leach, 1815</b>        |         |          |          |          |          |          |         |         |          |          |         |
| <b>Family ELATERIDAE Leach, 1815</b>              |         |          |          |          |          |          |         |         |          |          |         |
| Genus <i>Agriotes</i> Eschscholtz                 |         |          |          |          |          |          |         |         |          |          |         |
| <i>Agriotes obscurus</i> (Linnaeus, 1758)         |         |          |          |          |          |          |         |         |          |          |         |
| multiple ind.                                     | missing | DQ198644 | missing  | HM542030 | missing  | DQ198734 | missing | missing | HQ333805 | - n/a -  |         |
| <b>Superfamily TENEBRIONOIDEA Latreille, 1802</b> |         |          |          |          |          |          |         |         |          |          |         |
| <b>Family ADERIDAE Csiki, 1909</b>                |         |          |          |          |          |          |         |         |          |          |         |
| Genus <i>Aderus</i> Stephens                      |         |          |          |          |          |          |         |         |          |          |         |
| <i>Aderus</i> sp.                                 |         |          |          |          |          |          |         |         |          |          |         |
| UPOL ZL0197                                       | missing | missing  | missing  | FJ904066 | missing  | FJ903935 | missing | missing | EF210021 | - n/a -  |         |
| Genus <i>Phytobaenus</i> R.F. Sahlberg            |         |          |          |          |          |          |         |         |          |          |         |
| <i>Phytobaenus amabilis</i> R.F. Sahlberg, 1834   |         |          |          |          |          |          |         |         |          |          |         |
| BMNH 679279                                       | missing | DQ202594 | missing  | DQ221961 | missing  | DQ202659 | missing | missing | AY748187 | - n/a -  |         |
| <b>Family ANTHICIDAE Latreille, 1819</b>          |         |          |          |          |          |          |         |         |          |          |         |

|                                             |                    |         |          |         |          |         |          |         |          |         |  |
|---------------------------------------------|--------------------|---------|----------|---------|----------|---------|----------|---------|----------|---------|--|
| Genus <i>Anthelephila</i> Hope              |                    |         |          |         |          |         |          |         |          |         |  |
| <i>Anthelephila pedestris</i> (Rossi, 1790) | <b>UPOL ZL0051</b> | missing | FJ903703 | missing | FJ903984 | missing | FJ903835 | missing | EF210016 | - n/a - |  |
| Genus <i>Anthicomorphus</i> Lewis           |                    |         |          |         |          |         |          |         |          |         |  |
| <i>Anthicomorphus suturalis</i> Lewis, 1895 | <b>UPOL ZL0141</b> | missing | FJ903749 | missing | FJ904034 | missing | FJ903899 | missing | EF210019 | - n/a - |  |
| Anthicidae Gen. sp. 1                       | <b>UPOL ZL0060</b> | missing | FJ903710 | missing | FJ903991 | missing | FJ903842 | missing | EF210013 | - n/a - |  |
| Anthicidae Gen. sp. 2                       | <b>UPOL ZL0063</b> | missing | FJ903712 | missing | FJ903993 | missing | FJ903844 | missing | EF210015 | - n/a - |  |
| Anthicidae Gen. sp. 3                       | <b>UPOL ZL0076</b> | missing | missing  | missing | FJ904001 | missing | FJ903854 | missing | EF210014 | - n/a - |  |

#### Family BORIDAE Thomson, 1859

|                                        |                    |         |          |         |          |         |          |         |          |         |
|----------------------------------------|--------------------|---------|----------|---------|----------|---------|----------|---------|----------|---------|
| Genus <i>Boros</i> Herbst              |                    |         |          |         |          |         |          |         |          |         |
| <i>Boros schneideri</i> (Panzer, 1795) | <b>UPOL ZL0094</b> | missing | EF490134 | missing | EF490163 | missing | FJ903868 | missing | EF209989 | - n/a - |

#### Family CIIDAE Leach, 1819

|                                                   |                    |         |          |         |          |         |          |         |          |         |
|---------------------------------------------------|--------------------|---------|----------|---------|----------|---------|----------|---------|----------|---------|
| Genus <i>Cis</i> Latreille                        |                    |         |          |         |          |         |          |         |          |         |
| <i>Cis boleti</i> (Scopoli, 1763)                 | <b>UPOL ZL0182</b> | missing | FJ903769 | missing | FJ904059 | missing | FJ903027 | missing | EF209886 | - n/a - |
| Genus <i>Ennearthron</i> Mellie                   |                    |         |          |         |          |         |          |         |          |         |
| <i>Ennearthron cornutum</i> (Gyllenhal, 1827)     | <b>g05</b>         | missing | missing  | missing | FM877942 | missing | missing  | missing | FM877865 | - n/a - |
| Genus <i>Neoenearthron</i> Miyatake               |                    |         |          |         |          |         |          |         |          |         |
| <i>Neoenearthron hisamatsui</i> (Miyatake, 1954)  | <b>g64</b>         | missing | missing  | missing | FM877943 | missing | missing  | missing | FM877904 | - n/a - |
| Genus <i>Rhopalodontus</i> Mellie                 |                    |         |          |         |          |         |          |         |          |         |
| <i>Rhopalodontus perforatus</i> (Gyllenhal, 1813) | <b>g03</b>         | missing | missing  | missing | FM877952 | missing | missing  | missing | FM877863 | - n/a - |
| Genus <i>Sulcaxis</i> Dury                        |                    |         |          |         |          |         |          |         |          |         |
| <i>Sulcaxis affinis</i> (Gyllenhal, 1827)         | <b>g04</b>         | missing | missing  | missing | FM877947 | missing | missing  | missing | FM877864 | - n/a - |

#### Family MELANDRYIDAE Leach, 1815

|                                            |                    |         |          |         |          |         |          |         |          |         |
|--------------------------------------------|--------------------|---------|----------|---------|----------|---------|----------|---------|----------|---------|
| Genus <i>Abdera</i> Stephens               |                    |         |          |         |          |         |          |         |          |         |
| <i>Abdera quadrifasciata</i> Curtis, 1829  | <b>UPOL ZL0174</b> | missing | FJ903765 | missing | FJ904055 | missing | missing  | missing | EF209919 | - n/a - |
| Genus <i>Anisoxya</i> Mulsant              |                    |         |          |         |          |         |          |         |          |         |
| <i>Anisoxya fuscula</i> (Illiger, 1798)    | <b>UPOL ZL0162</b> | missing | FJ903759 | missing | FJ904048 | missing | FJ903916 | missing | EF209915 | - n/a - |
| Genus <i>Dircaea</i> Fabricius             |                    |         |          |         |          |         |          |         |          |         |
| <i>Dircaea</i> sp.                         | <b>UPOL ZL0083</b> | missing | FJ903724 | missing | FJ904007 | missing | missing  | missing | missing  | - n/a - |
| Genus <i>Enchodes</i> LeConte              |                    |         |          |         |          |         |          |         |          |         |
| <i>Enchodes crepusculus</i> Lewis, 1895    | <b>UPOL ZL0124</b> | missing | FJ903740 | missing | FJ904025 | missing | FJ903889 | missing | EF209895 | - n/a - |
| Genus <i>Hypulus</i> Paykull               |                    |         |          |         |          |         |          |         |          |         |
| <i>Hypulus acutangulus</i> Lewis, 1895     | <b>UPOL ZL0159</b> | missing | missing  | missing | FJ904405 | missing | FJ903913 | missing | EF209914 | - n/a - |
| <i>Hypulus cingulatus</i> Lewis, 1895      | <b>UPOL ZL0119</b> | missing | EF490138 | missing | EF490166 | missing | FJ903884 | missing | EF209906 | - n/a - |
| <i>Hypulus quercinus</i> (Quensel, 1790)   | <b>UPOL ZL0158</b> | missing | FJ903757 | missing | FJ904044 | missing | FJ903912 | missing | EF209913 | - n/a - |
| Genus <i>Melandrya</i> Fabricius           |                    |         |          |         |          |         |          |         |          |         |
| <i>Melandrya barbata</i> (Fabricius, 1792) | <b>UPOL ZL0156</b> | missing | FJ903756 | missing | FJ904042 | missing | FJ903910 | missing | EF209897 | - n/a - |
| <i>Melandrya dubia</i> (Schaller, 1783)    | <b>UPOL ZL0155</b> | missing | FJ903755 | missing | FJ904041 | missing | FJ903909 | missing | EF209899 | - n/a - |

|                                                    |                    |         |          |         |          |         |          |         |          |         |
|----------------------------------------------------|--------------------|---------|----------|---------|----------|---------|----------|---------|----------|---------|
| <i>Melandrya modesta</i> Lewis, 1895               | <b>UPOL ZL0048</b> | missing | missing  | missing | FJ903982 | missing | FJ903833 | missing | FJ903792 | - n/a - |
| <i>Melandrya pictipennis</i> Lewis, 1895           | <b>UPOL ZL0069</b> | missing | FJ903716 | missing | FJ903998 | missing | FJ903850 | missing | missing  | - n/a - |
| <i>Melandrya</i> sp.                               | <b>UPOL ZL0120</b> | missing | FJ903739 | missing | FJ904024 | missing | FJ903885 | missing | FJ903797 | - n/a - |
| Genus <i>Microtonus</i> LeConte                    |                    |         |          |         |          |         |          |         |          |         |
| <i>Microtonus dimidiatus</i> Marseul, 1876         | <b>UPOL ZL0144</b> | missing | EF490137 | missing | EF490165 | missing | FJ903901 | missing | EF209896 | - n/a - |
| <i>Microtonus</i> sp.                              | <b>UPOL ZL0140</b> | missing | FJ903748 | missing | FJ904033 | missing | FJ903898 | missing | EF209910 | - n/a - |
| Genus <i>Mikadonius</i> Lewis                      |                    |         |          |         |          |         |          |         |          |         |
| <i>Mikadonius gracilis</i> Lewis, 1895             | <b>UPOL ZL0033</b> | missing | FJ903700 | missing | FJ903979 | missing | FJ903828 | missing | FJ903791 | - n/a - |
| Genus <i>Orchesia</i> Latreille                    |                    |         |          |         |          |         |          |         |          |         |
| <i>Orchesia imitans</i> Lewis, 1895                | <b>UPOL ZL0080</b> | missing | FJ903721 | missing | FJ904004 | missing | missing  | missing | EF209904 | - n/a - |
| <i>Orchesia micans</i> (Panzer, 1795)              | <b>UPOL ZL0157</b> | missing | missing  | missing | FJ904043 | missing | FJ903911 | missing | EF209912 | - n/a - |
| <i>Orchesia minor</i> Walker, 1837                 | <b>UPOL ZL0175</b> | missing | FJ903766 | missing | FJ904056 | missing | FJ903923 | missing | EF209920 | - n/a - |
| <i>Orchesia undulata</i> Kraatz, 1853              | <b>UPOL ZL0173</b> | missing | missing  | missing | FJ904054 | missing | FJ903922 | missing | EF209918 | - n/a - |
| Genus <i>Osphya</i> Illiger                        |                    |         |          |         |          |         |          |         |          |         |
| <i>Osphya orientalis</i> (Lewis, 1895)             | <b>UPOL ZL0122</b> | missing | EF490139 | missing | EF490167 | missing | FJ903887 | missing | EF209898 | - n/a - |
| Genus <i>Phloiotrya</i> Stephens                   |                    |         |          |         |          |         |          |         |          |         |
| <i>Phloiotrya bellicosa</i> (Lewis, 1895)          | <b>UPOL ZL0012</b> | missing | FJ903688 | missing | FJ903963 | missing | FJ903811 | missing | EF209900 | - n/a - |
| <i>Phloiotrya flavitarsis</i> (Lewis, 1895)        | <b>UPOL ZL0138</b> | missing | FJ903746 | missing | FJ904007 | missing | FJ903896 | missing | EF209908 | - n/a - |
| <i>Phloiotrya obscura</i> (Lewis, 1895)            | <b>UPOL ZL0160</b> | missing | missing  | missing | FJ904046 | missing | FJ903914 | missing | FJ903799 | - n/a - |
| <i>Phloiotrya planiuscula</i> Nomura & Kato, 1959  | <b>UPOL ZL0130</b> | missing | FJ903741 | missing | FJ904026 | missing | FJ903890 | missing | EF209907 | - n/a - |
| <i>Phloiotrya rufipes</i> (Gyllenhal, 1810)        | <b>UPOL ZL0176</b> | missing | FJ903767 | missing | FJ904057 | missing | FJ903924 | missing | FJ903800 | - n/a - |
| Genus <i>Phryganophilus</i> C.R. Sahlberg          |                    |         |          |         |          |         |          |         |          |         |
| <i>Phryganophilus ruficollis</i> (Fabricius, 1798) | <b>UPOL ZL0032</b> | missing | FJ903699 | missing | FJ903978 | missing | FJ903827 | missing | EF209902 | - n/a - |
| Melandyridae Gen. sp.                              | <b>UPOL ZL0081</b> | missing | FJ903722 | missing | FJ904005 | missing | FJ903857 | missing | FJ903795 | - n/a - |

#### Family MELOIDAE Gyllenhal, 1810

|                                                  |                    |         |          |         |          |         |          |         |          |         |
|--------------------------------------------------|--------------------|---------|----------|---------|----------|---------|----------|---------|----------|---------|
| Genus <i>Epicauta</i> Dejean                     |                    |         |          |         |          |         |          |         |          |         |
| <i>Epicauta</i> sp.                              | <b>UPOL ZL0135</b> | missing | FJ903744 | missing | FJ904029 | missing | FJ903894 | missing | EF209988 | - n/a - |
| Genus <i>Horia</i> Fabricius                     |                    |         |          |         |          |         |          |         |          |         |
| <i>Horia roepkei</i> Betrem, 1929                | <b>UPOL ZL0115</b> | missing | EF490134 | missing | EF490169 | missing | FJ903883 | missing | EF209984 | - n/a - |
| Genus <i>Lydomorphus</i> Fairmaire               |                    |         |          |         |          |         |          |         |          |         |
| <i>Lydomorphus bifoveiceps</i> (Fairmaire, 1897) | <b>UPOL ZL0106</b> | missing | FJ903732 | missing | FJ904016 | missing | FJ903874 | missing | EF209987 | - n/a - |
| Genus <i>Lytta</i> Fabricius                     |                    |         |          |         |          |         |          |         |          |         |
| <i>Lytta vesicatoria</i> (Linnaeus, 1758)        | <b>UPOL ZL0005</b> | missing | EF490140 | missing | EF490168 | missing | FJ903806 | missing | EF209985 | - n/a - |
| Genus <i>Meloe</i> Linnaeus                      |                    |         |          |         |          |         |          |         |          |         |
| <i>Meloe decorus</i> Brandt & Erichson, 1832     | <b>UPOL ZL0113</b> | missing | FJ903737 | missing | FJ904022 | missing | FJ903881 | missing | EF209982 | - n/a - |
| <i>Meloe proscarabaeus</i> Linnaeus, 1758        | <b>UPOL ZL0114</b> | missing | FJ903738 | missing | FJ904023 | missing | FJ903882 | missing | EF209983 | - n/a - |
| <i>Meloe uralensis</i> Pallas, 1777              | <b>UPOL ZL0112</b> | missing | FJ903736 | missing | FJ904021 | missing | FJ903880 | missing | EF209981 | - n/a - |

#### Family MORDELLIDAE Latreille, 1802

Genus *Glipa* LeConte

|                                                    |                    |         |          |         |          |         |          |         |          |         |
|----------------------------------------------------|--------------------|---------|----------|---------|----------|---------|----------|---------|----------|---------|
| <i>Glipa angustatissima</i> Pic, 1911              | <b>UPOL ZL0137</b> | missing | FJ903745 | missing | FJ904030 | missing | FJ903895 | missing | EF209927 | - n/a - |
| <i>Glipa ishigakiana</i> Kono, 1932                | <b>UPOL ZL0088</b> | missing | EF490143 | missing | EF490171 | missing | FJ903862 | missing | EF209921 | - n/a - |
| Genus <i>Hoshihananomia</i> Kono                   |                    |         |          |         |          |         |          |         |          |         |
| <i>Hoshihananomia perlata</i> (Sulzer, 1776)       | <b>UPOL ZL0092</b> | missing | FJ903729 | missing | FJ904013 | missing | FJ903866 | missing | EF209925 | - n/a - |
| Genus <i>Mordella</i> Linnaeus                     |                    |         |          |         |          |         |          |         |          |         |
| <i>Mordella brachyura</i> Mulsant, 1856            | <b>UPOL ZL0089</b> | missing | EF490144 | missing | EF490172 | missing | FJ903863 | missing | EF209922 | - n/a - |
| Genus <i>Mordellistena</i> Costa                   |                    |         |          |         |          |         |          |         |          |         |
| <i>Mordellistena brevicauda</i> (Boheman, 1849)    | <b>UPOL ZL0070</b> | missing | FJ903717 | missing | missing  | missing | FJ903851 | missing | EF209926 | - n/a - |
| <i>Mordellistena neuwaldeggiana</i> (Panzer, 1796) | <b>UPOL ZL0090</b> | missing | FJ903727 | missing | FJ904010 | missing | FJ903864 | missing | EF209923 | - n/a - |

#### Family MYCETOPHAGIDAE Leach, 1815

|                                                       |                    |         |          |         |          |         |          |         |          |         |
|-------------------------------------------------------|--------------------|---------|----------|---------|----------|---------|----------|---------|----------|---------|
| Genus <i>Litargus</i> Erichson                        |                    |         |          |         |          |         |          |         |          |         |
| <i>Litargus connexus</i> (Fourcroy, 1785)             | <b>UPOL ZL0151</b> | missing | FJ903754 | missing | FJ904039 | missing | FJ903907 | missing | EF209883 | - n/a - |
| <i>Litargus</i> sp. 1                                 | <b>UPOL ZL0145</b> | missing | EF490145 | missing | EF490173 | missing | FJ903902 | missing | EF209880 | - n/a - |
| <i>Litargus</i> sp. 2                                 | <b>UPOL ZL0146</b> | missing | FJ903751 | missing | FJ904036 | missing | FJ903903 | missing | EF209881 | - n/a - |
| Genus <i>Mycetophagus</i> Hellwig                     |                    |         |          |         |          |         |          |         |          |         |
| <i>Mycetophagus atomarius</i> (Fabricius, 1787)       | <b>UPOL ZL0150</b> | missing | FJ903753 | missing | FJ904038 | missing | FJ903906 | missing | EF209882 | - n/a - |
| <i>Mycetophagus quadripustulatus</i> (Linnaeus, 1761) | <b>UPOL ZL0014</b> | missing | EF490159 | missing | missing  | missing | FJ903813 | missing | EF209884 | - n/a - |

#### Family OEDEMERIDAE Latreille, 1810

|                                                 |                      |          |          |         |          |         |          |         |          |         |
|-------------------------------------------------|----------------------|----------|----------|---------|----------|---------|----------|---------|----------|---------|
| Genus <i>Chrysanthia</i> Schmidt                |                      |          |          |         |          |         |          |         |          |         |
| <i>Chrysanthia viridissima</i> (Linnaeus, 1758) | <b>UPOL ZL0010</b>   | missing  | FJ903686 | missing | FJ903961 | missing | FJ903809 | missing | EF209973 | - n/a - |
| Genus <i>Nacerdes</i> Dejean                    |                      |          |          |         |          |         |          |         |          |         |
| <i>Nacerdes hilleri</i> (Harold, 1878)          | <b>UPOL ZL0015</b>   | missing  | EF490146 | missing | EF490174 | missing | FJ903814 | missing | EF209974 | - n/a - |
| <i>Nacerdes umenoi</i> (Kono, 1937)             | <b>UPOL ZL0028</b>   | missing  | FJ903696 | missing | FJ903974 | missing | FJ903823 | missing | FJ903790 | - n/a - |
| Genus <i>Oedemera</i> Olivier                   |                      |          |          |         |          |         |          |         |          |         |
| <i>Oedemera femorata</i> (Scopoli, 1763)        | <b>UPOL ZL0056</b>   | missing  | FJ903708 | missing | FJ903989 | missing | FJ903840 | missing | EF209977 | - n/a - |
| <i>Oedemera nobilis</i> (Scopoli, 1763)         | <b>multiple ind.</b> | AF232898 | missing  | missing | DQ221991 | missing | missing  | missing | AY748202 | - n/a - |
| <i>Oedemera podagrariae</i> (Linnaeus, 1767)    | <b>UPOL ZL0055</b>   | missing  | FJ903707 | missing | FJ903988 | missing | FJ903839 | missing | EF209976 | - n/a - |
| <i>Oedemera virescens</i> (Linnaeus, 1767)      | <b>UPOL ZL0007</b>   | missing  | missing  | missing | FJ903959 | missing | FJ903807 | missing | EF209972 | - n/a - |
| <i>Oedemera venosa</i> (Lewis, 1795)            | <b>UPOL ZL0062</b>   | missing  | FJ903711 | missing | FJ903992 | missing | FJ903843 | missing | EF209975 | - n/a - |

#### Family PYROCHROIDAE Latreille, 1806

|                                            |                    |         |          |         |          |         |          |         |          |         |
|--------------------------------------------|--------------------|---------|----------|---------|----------|---------|----------|---------|----------|---------|
| Genus <i>Pedilus</i> Fischer von Waldheim  |                    |         |          |         |          |         |          |         |          |         |
| <i>Pedilus okamotoi</i> (Kono, 1935)       | <b>UPOL ZL0123</b> | missing | missing  | missing | EF490175 | missing | FJ903888 | missing | EF209996 | - n/a - |
| Genus <i>Pyrochroa</i> O.F. Müller         |                    |         |          |         |          |         |          |         |          |         |
| <i>Pyrochroa coccinea</i> (Linnaeus, 1761) | <b>UPOL ZL0002</b> | missing | FJ903683 | missing | FJ903956 | missing | FJ903803 | missing | EF209991 | - n/a - |
| <i>Pyrochroa</i> sp.                       | <b>UPOL ZL0009</b> | missing | FJ903685 | missing | FJ903960 | missing | FJ903808 | missing | EF209992 | - n/a - |
| Pyrochroidae Gen. sp. 1                    | <b>UPOL ZL0022</b> | missing | FJ903691 | missing | FJ903968 | missing | FJ903817 | missing | EF209993 | - n/a - |
| Pyrochroidae Gen. sp. 2                    | <b>UPOL ZL0165</b> | missing | FJ903761 | missing | FJ904050 | missing | FJ903918 | missing | EF209997 | - n/a - |



|                       |                    |         |          |         |          |         |          |         |          |         |
|-----------------------|--------------------|---------|----------|---------|----------|---------|----------|---------|----------|---------|
| <i>Scryptia</i> sp. 1 | <b>UPOL ZL0093</b> | missing | EF490151 | missing | EF490181 | missing | FJ903867 | missing | EF210026 | - n/a - |
| <i>Scryptia</i> sp. 2 | <b>UPOL ZL0187</b> | missing | FJ903770 | missing | FJ904061 | missing | FJ903929 | missing | EF210023 | - n/a - |
| <i>Scryptia</i> sp. 3 | <b>UPOL ZL0190</b> | missing | FJ903773 | missing | FJ904064 | missing | FJ903932 | missing | EF210029 | - n/a - |
| Scryptiidae Gen. sp.  | <b>UPOL ZL0188</b> | missing | FJ903771 | missing | FJ904062 | missing | FJ903930 | missing | EF210027 | - n/a - |

**Family STENOTRACHELIDAE Thomson, 1859**

|                                              |                    |         |          |         |          |         |          |         |          |         |
|----------------------------------------------|--------------------|---------|----------|---------|----------|---------|----------|---------|----------|---------|
| Genus <i>Sponidium</i> Casey                 |                    |         |          |         |          |         |          |         |          |         |
| <i>Sponidium pallens</i> (Motschulsky, 1860) | <b>UPOL ZL0050</b> | missing | EF490135 | missing | FJ903983 | missing | FJ903834 | missing | EF209980 | - n/a - |

**Family TENEBRIONIDAE Latreille, 1802**

Subfamily ALLECULINAE Laporte, 1840

Tribe ALLECULINI Laporte, 1840

|                                         |                    |         |          |         |          |         |          |         |          |         |
|-----------------------------------------|--------------------|---------|----------|---------|----------|---------|----------|---------|----------|---------|
| Genus <i>Borboresthes</i> Fairmaire     |                    |         |          |         |          |         |          |         |          |         |
| <i>Borboresthes</i> sp.                 | <b>UPOL ZL0068</b> | missing | FJ903715 | missing | FJ903997 | missing | FJ903849 | missing | missing  | - n/a - |
| Genus <i>Gonodera</i> Mulsant           |                    |         |          |         |          |         |          |         |          |         |
| <i>Gonodera luperus</i> (Herbst, 1783)  | <b>UPOL ZL0024</b> | missing | FJ903693 | missing | FJ903970 | missing | FJ903819 | missing | EF209958 | - n/a - |
| Genus <i>Hymenalia</i> Mulsant          |                    |         |          |         |          |         |          |         |          |         |
| <i>Hymenalia</i> sp.                    | <b>UPOL ZL0030</b> | missing | FJ903698 | missing | FJ903976 | missing | FJ903825 | missing | EF209961 | - n/a - |
| Genus <i>Isomira</i> Mulsant            |                    |         |          |         |          |         |          |         |          |         |
| <i>Isomira antennata</i> (Panzer, 1798) | <b>UPOL ZL0065</b> | missing | FJ903714 | missing | FJ903995 | missing | FJ903846 | missing | EF209965 | - n/a - |
| <i>Isomira</i> sp.                      | <b>UPOL ZL0166</b> | missing | FJ903762 | missing | FJ904051 | missing | FJ903919 | missing | EF209969 | - n/a - |

Tribe CTENIOPODINI Solier, 1835

|                                              |                    |         |          |         |          |         |          |         |          |         |
|----------------------------------------------|--------------------|---------|----------|---------|----------|---------|----------|---------|----------|---------|
| Genus <i>Cteniopus</i> Solier                |                    |         |          |         |          |         |          |         |          |         |
| <i>Cteniopus sulphureus</i> (Linnaeus, 1758) | <b>UPOL ZL0001</b> | missing | FJ903682 | missing | FJ903955 | missing | FJ903802 | missing | EF209948 | - n/a - |
| Genus <i>Omophlus</i> Solier                 |                    |         |          |         |          |         |          |         |          |         |
| <i>Omophlus rugosicollis</i> (Brullé, 1832)  | <b>UPOL ZL0023</b> | missing | FJ903692 | missing | FJ903969 | missing | FJ903818 | missing | EF209957 | - n/a - |
| Cteniopodini Gen. sp.                        | <b>UPOL ZL0064</b> | missing | FJ903713 | missing | missing  | missing | FJ903845 | missing | EF209964 | - n/a - |

Subfamily DIAPERINAE Latreille, 1802

Tribe CRYPTICINI Brullé, 1832

|                                                           |                    |          |         |          |          |         |          |          |          |          |
|-----------------------------------------------------------|--------------------|----------|---------|----------|----------|---------|----------|----------|----------|----------|
| Genus <i>Crypticus</i> Latreille                          |                    |          |         |          |          |         |          |          |          |          |
| <i>Crypticus gibbulus</i> (Quensel, 1806)                 | <b>LSOL.00074</b>  | KJ002795 | missing | KJ003076 | KJ003228 | missing | missing  | KJ003376 | KJ003572 | KJ003717 |
| <i>Crypticus quisquilius pyrenaicus</i> Baudi, 1876       | <b>LSOL.00136</b>  | KJ002796 | missing | missing  | KJ003229 | missing | missing  | KJ003377 | missing  | - n/a -  |
| <i>Crypticus quisquilius quisquilius</i> (Linnaeus, 1761) | <b>UPOL ZL0066</b> | missing  | missing | missing  | FJ903996 | missing | FJ903847 | missing  | EF209966 | - n/a -  |

Tribe DIAPERINI Latreille, 1802

|                                         |                    |         |          |         |          |         |          |         |          |         |
|-----------------------------------------|--------------------|---------|----------|---------|----------|---------|----------|---------|----------|---------|
| Genus <i>Diaperis</i> Geoffroy          |                    |         |          |         |          |         |          |         |          |         |
| <i>Diaperis boleti</i> (Linnaeus, 1758) | <b>UPOL ZL0003</b> | missing | FJ903684 | missing | FJ903957 | missing | FJ903804 | missing | EF209945 | - n/a - |

|                                                      |                    |          |          |          |          |          |          |          |          |          |
|------------------------------------------------------|--------------------|----------|----------|----------|----------|----------|----------|----------|----------|----------|
| <i>Diaperis lewisi</i> Bates, 1873                   | <b>UPOL.ZL0074</b> | missing  | EF490153 | missing  | EF490183 | missing  | FJ903852 | missing  | EF209946 | - n/a -  |
| Genus <i>Gnatocerus</i> Thunberg                     |                    |          |          |          |          |          |          |          |          |          |
| <i>Gnatocerus cornutus</i> (Fabricius, 1798)         | <b>none</b>        | missing  | EU048290 | missing  | EU048282 | EU048306 | EU048306 | EU048298 | missing  | - n/a -  |
| Genus <i>Pentaphyllus</i> Latreille                  |                    |          |          |          |          |          |          |          |          |          |
| <i>Pentaphyllus chrysomeloides</i> (Rossi, 1792)     | <b>LSOL.00071</b>  | KJ002797 | missing  | KJ003077 | KJ003230 | KJ003476 | missing  | KJ003378 | KJ003573 | KJ003718 |
| <i>Pentaphyllus testaceus</i> (Hellwig, 1792)        | <b>673329</b>      | missing  | missing  | missing  | missing  | missing  | missing  | missing  | EF362954 | - n/a -  |
| Genus <i>Platydema</i> Laporte de Castelnau & Brullé |                    |          |          |          |          |          |          |          |          |          |
| <i>Platydema striatum</i> (Montrouzier, 1860)        | <b>LSOL.01287</b>  | KJ002798 | missing  | missing  | missing  | missing  | missing  | missing  | KJ003574 | KJ003719 |
| <i>Platydema</i> sp. 1                               | <b>LSOL.01279</b>  | KJ002799 | KJ002970 | missing  | missing  | KJ003477 | missing  | missing  | KJ003575 | KJ003720 |
| <i>Platydema</i> sp. 2                               | <b>LSOL.01929</b>  | KJ002800 | missing  | missing  | missing  | missing  | missing  | missing  | missing  | - n/a -  |
| Tribe GNATHIDIINI Gebien, 1921                       |                    |          |          |          |          |          |          |          |          |          |
| Genus <i>Menimus</i> Sharp                           |                    |          |          |          |          |          |          |          |          |          |
| <i>Menimus crassus</i> Broun, 1880                   | <b>LSOL.01716</b>  | KJ002801 | KJ002971 | KJ003078 | KJ003231 | KJ003478 | missing  | missing  | KJ003576 | KJ003721 |
| <i>Menimus hydrovatinus</i> (Fauvel, 1904)           | <b>LSOL.01113</b>  | KJ002802 | KJ002972 | KJ003079 | KJ003232 | KJ003479 | missing  | missing  | KJ003577 | KJ003722 |
| <i>Menimus setosellus</i> (Fauvel, 1904)             | <b>LSOL.01219</b>  | KJ002803 | KJ002973 | KJ003080 | missing  | KJ003480 | missing  | missing  | KJ003578 | KJ003723 |
| <i>Menimus</i> sp. 1                                 | <b>LSOL.01216</b>  | KJ002805 | KJ002976 | KJ003083 | KJ003233 | missing  | missing  | missing  | KJ003580 | - n/a -  |
| <i>Menimus</i> sp. 2                                 | <b>LSOL.01822</b>  | KJ002804 | KJ002974 | KJ003081 | missing  | missing  | missing  | missing  | missing  | - n/a -  |
| <i>Menimus</i> sp. 3                                 | <b>LSOL.01866</b>  | missing  | KJ002975 | KJ003082 | missing  | missing  | missing  | missing  | KJ003579 | KJ003724 |
| Tribe HYOCINI Medvedev and Lawrence, 1982            |                    |          |          |          |          |          |          |          |          |          |
| Genus <i>Parahyocis</i> Kaszab                       |                    |          |          |          |          |          |          |          |          |          |
| <i>Parahyocis championi</i> (Fauvel, 1904)           | <b>LSOL.02002</b>  | KJ002806 | KJ002977 | KJ003084 | missing  | KJ003481 | missing  | missing  | KJ003581 | KJ003725 |
| Tribe PHALERIINI Latreille, 1802                     |                    |          |          |          |          |          |          |          |          |          |
| Genus <i>Halammobia</i> Semenov                      |                    |          |          |          |          |          |          |          |          |          |
| <i>Halammobia pellucida</i> (Herbst, 1799)           | <b>LSOL.00042</b>  | KJ002807 | missing  | KJ003085 | KJ003234 | KJ003482 | missing  | KJ003379 | KJ003582 | KJ003726 |
| Genus <i>Phaleria</i> Latreille                      |                    |          |          |          |          |          |          |          |          |          |
| <i>Phaleria bimaculata</i> (Linnaeus, 1767)          | <b>LSOL.00046</b>  | KJ002808 | missing  | missing  | KJ003235 | missing  | missing  | missing  | missing  | - n/a -  |
| <i>Phaleria cadaverina</i> (Fabricius, 1792)         | <b>LSOL.00057</b>  | KJ002809 | missing  | KJ003086 | KJ003236 | missing  | missing  | KJ003380 | KJ003583 | KJ003727 |
| <i>Phaleria prolixa</i> (Fairmaire, 1869)            | <b>LSOL.00105</b>  | KJ002810 | missing  | KJ003087 | KJ003237 | missing  | missing  | KJ003381 | missing  | - n/a -  |
| Tribe SCAPHIDEMINI Reitter, 1922                     |                    |          |          |          |          |          |          |          |          |          |
| Genus <i>Spiloscapa</i> Bates                        |                    |          |          |          |          |          |          |          |          |          |
| <i>Spiloscapa</i> sp.                                | <b>LSOL.01667</b>  | KJ002811 | KJ002978 | missing  | missing  | missing  | missing  | missing  | missing  | KJ003728 |
| Tribe TRACHYSCELINI Blanchard, 1845                  |                    |          |          |          |          |          |          |          |          |          |
| Genus <i>Trachyscelis</i> Latreille                  |                    |          |          |          |          |          |          |          |          |          |
| <i>Trachyscelis aphodioides</i> Latreille, 1809      | <b>LSOL.00055</b>  | KJ002812 | missing  | missing  | KJ003238 | KJ003483 | missing  | KJ003382 | KJ003584 | KJ003729 |
| <i>Trachyscelis ciliaris</i> Champion, 1893          | <b>LSOL.01658</b>  | KJ002813 | KJ002979 | KJ003088 | KJ003239 | KJ003484 | missing  | missing  | KJ003585 | KJ003730 |

Subfamily LAGRIINAE Latreille, 1825

Tribe ADELINI Kirby, 1828

Genus *Adelium* Kirby

|                                                 |            |          |          |          |          |          |         |          |          |          |
|-------------------------------------------------|------------|----------|----------|----------|----------|----------|---------|----------|----------|----------|
| <i>Adelium alpicola</i> Blackburn, 1892         | LSOL.01692 | KJ002814 | KJ002980 | KJ003089 | KJ003240 | KJ003485 | missing | KJ003383 | KJ003586 | KJ003731 |
| <i>Adelium</i> pr. <i>angulare</i> Pascoe, 1866 | LSOL.01681 | KJ002815 | missing  | KJ003090 | KJ003241 | KJ003486 | missing | KJ003384 | KJ003587 | KJ003732 |
| <i>Adelium</i> sp.                              | LSOL.01677 | KJ002816 | KJ002981 | KJ003091 | missing  | KJ003487 | missing | missing  | KJ003588 | KJ003733 |

Genus *Acrothymus* Pascoe

|                                               |            |          |          |          |          |         |         |         |          |          |
|-----------------------------------------------|------------|----------|----------|----------|----------|---------|---------|---------|----------|----------|
| <i>Acrothymus tristis</i> (Montrouzier, 1860) | LSOL.01935 | KJ002817 | KJ002982 | KJ003092 | KJ003242 | missing | missing | missing | KJ003489 | KJ003734 |
|-----------------------------------------------|------------|----------|----------|----------|----------|---------|---------|---------|----------|----------|

Genus *Cardiothorax* Motschulsky

|                                             |            |          |          |          |          |         |         |         |          |          |
|---------------------------------------------|------------|----------|----------|----------|----------|---------|---------|---------|----------|----------|
| <i>Cardiothorax howitti</i> (Pascoe, 1869)  | LSOL.01649 | KJ002818 | KJ002983 | KJ003093 | missing  | missing | missing | missing | KJ003590 | KJ003735 |
| <i>Cardiothorax laticollis</i> Carter, 1911 | LSOL.01679 | KJ002819 | KJ002984 | KJ003094 | KJ003243 | missing | missing | missing | KJ003591 | KJ003736 |

Genus *Coripera* Pascoe

|                                        |            |          |          |          |          |         |         |         |          |         |
|----------------------------------------|------------|----------|----------|----------|----------|---------|---------|---------|----------|---------|
| <i>Coripera morleyana</i> Carter, 1905 | LSOL.01624 | KJ002820 | KJ002985 | KJ003095 | KJ003244 | missing | missing | missing | KJ003592 | - n/a - |
|----------------------------------------|------------|----------|----------|----------|----------|---------|---------|---------|----------|---------|

Genus *Cymbeba* Pascoe

|                                         |            |          |          |          |          |          |         |          |          |          |
|-----------------------------------------|------------|----------|----------|----------|----------|----------|---------|----------|----------|----------|
| <i>Cymbeba annulipes</i> (Fauvel, 1904) | LSOL.02272 | KJ002821 | KJ002986 | KJ003096 | KJ003245 | KJ003488 | missing | missing  | KJ003593 | KJ003737 |
| <i>Cymbeba bavayi</i> Fauvel, 1904      | LSOL.01798 | KJ002822 | missing  | KJ003097 | missing  | missing  | missing | missing  | KJ003594 | KJ003738 |
| <i>Cymbeba trapezus</i> (Fauvel, 1904)  | LSOL.02051 | KJ002826 | KJ002990 | KJ003101 | KJ003249 | KJ003489 | missing | KJ003385 | KJ003596 | KJ003739 |
| <i>Cymbeba watti</i> Kaszab, 1982       | LSOL.01093 | KJ002827 | missing  | missing  | missing  | missing  | missing | missing  | missing  | - n/a -  |
| <i>Cymbeba</i> sp. 1                    | LSOL.01346 | KJ002823 | missing  | missing  | KJ003246 | missing  | missing | missing  | missing  | - n/a -  |
| <i>Cymbeba</i> sp. 2                    | LSOL.01824 | KJ002824 | KJ002987 | KJ003098 | missing  | missing  | missing | missing  | missing  | - n/a -  |
| <i>Cymbeba</i> sp. 3                    | LSOL.01889 | KJ002825 | KJ002988 | KJ003099 | KJ003247 | missing  | missing | missing  | missing  | - n/a -  |
| <i>Cymbeba</i> sp. 4                    | LSOL.02050 | missing  | KJ002989 | KJ003100 | KJ003248 | missing  | missing | missing  | KJ003595 | - n/a -  |

Genus *Isopteron* Hope

|                      |            |          |          |          |          |         |         |         |          |          |
|----------------------|------------|----------|----------|----------|----------|---------|---------|---------|----------|----------|
| <i>Isopteron</i> sp. | LSOL.01687 | KJ002828 | KJ002991 | KJ003102 | KJ003250 | missing | missing | missing | KJ003597 | KJ003740 |
|----------------------|------------|----------|----------|----------|----------|---------|---------|---------|----------|----------|

Genus *Neoadelium* Carter

|                            |            |          |          |          |          |          |         |          |          |          |
|----------------------------|------------|----------|----------|----------|----------|----------|---------|----------|----------|----------|
| <i>Neoadelium fauveli</i>  | LSOL.01864 | KJ002829 | KJ002992 | KJ003103 | KJ003251 | KJ003490 | missing | KJ003386 | KJ003598 | KJ003741 |
| <i>Neoadelium genitale</i> | LSOL.01302 | KJ002830 | KJ002993 | KJ003104 | KJ003252 | missing  | missing | missing  | KJ003599 | KJ003742 |

Genus *Nolicima* Matthews

|                     |            |          |          |          |          |          |         |         |          |          |
|---------------------|------------|----------|----------|----------|----------|----------|---------|---------|----------|----------|
| <i>Nolicima</i> sp. | LSOL.01684 | KJ002831 | KJ002994 | KJ003105 | KJ003253 | KJ003491 | missing | missing | KJ003600 | KJ003743 |
|---------------------|------------|----------|----------|----------|----------|----------|---------|---------|----------|----------|

Genus *Periatrum* Sharp

|                         |            |          |          |          |          |          |         |          |          |          |
|-------------------------|------------|----------|----------|----------|----------|----------|---------|----------|----------|----------|
| <i>Periatrum helmsi</i> | LSOL.01765 | KJ002832 | KJ002995 | KJ003106 | KJ003254 | KJ003492 | missing | KJ003387 | KJ003601 | KJ003744 |
|-------------------------|------------|----------|----------|----------|----------|----------|---------|----------|----------|----------|

Genus *Pheloneis* Pascoe

|                            |            |          |          |          |          |         |         |          |          |         |
|----------------------------|------------|----------|----------|----------|----------|---------|---------|----------|----------|---------|
| <i>Pheloneis amaroides</i> | LSOL.01732 | KJ002833 | KJ002996 | KJ003107 | KJ003255 | missing | missing | KJ003388 | KJ003602 | - n/a - |
|----------------------------|------------|----------|----------|----------|----------|---------|---------|----------|----------|---------|

Genus *Pseudocilibe* Kaszab

|                                |            |          |          |          |         |         |         |          |          |          |
|--------------------------------|------------|----------|----------|----------|---------|---------|---------|----------|----------|----------|
| <i>Pseudocilibe samuelsoni</i> | LSOL.01795 | KJ002834 | KJ002997 | KJ003108 | missing | missing | missing | KJ003389 | KJ003603 | KJ003745 |
|--------------------------------|------------|----------|----------|----------|---------|---------|---------|----------|----------|----------|

Genus *Zeadelium* Watt

|                              |            |          |          |          |          |          |         |          |          |          |
|------------------------------|------------|----------|----------|----------|----------|----------|---------|----------|----------|----------|
| <i>Zeadelium arthurensis</i> | LSOL.01752 | KJ002835 | KJ002998 | KJ003109 | KJ003256 | KJ003493 | missing | KJ003390 | KJ003604 | KJ003746 |
| <i>Zeadelium complicatum</i> | LSOL.01733 | KJ002836 | KJ002999 | KJ003110 | KJ003257 | KJ003494 | missing | KJ003391 | KJ003605 | KJ003747 |
| <i>Zeadelium thoracicum</i>  | LSOL.01759 | KJ002838 | KJ003000 | KJ003112 | KJ003258 | KJ003495 | missing | missing  | KJ003607 | KJ003749 |
| <i>Zeadelium</i> sp.         | LSOL.01751 | KJ002837 | missing  | KJ003111 | missing  | missing  | missing | missing  | KJ003606 | KJ003748 |

Tribe CHAERODINI Doyen et al. 1990

Genus *Chaerodes* White

*Chaerodes trachyscelides* White, 1846 **LSOL.01701** KJ002839 KJ003001 missing KJ003259 KJ003496 missing KJ003392 KJ003608 KJ003750

Tribe LAGRIINI Latreille, 1825

Genus *Adynata* Fahraeus

*Adynata brevicollis* (Fahraeus, 1870) **UPOL ZL0107** missing FJ903733 missing FJ904017 missing FJ903875 missing EF209952 - n/a -

Genus *Anisostira* Borchmann

*Anisostira rugipennis* Lewis, 1896 **UPOL ZL0013** missing FJ903689 missing FJ903964 missing FJ903812 missing EF209954 - n/a -

Genus *Arthromacra* Kirby

*Arthromacra amamiana* Nakane, 1963 **UPOL ZL0029** missing FJ903697 missing FJ903975 missing FJ903824 missing EF209971 - n/a -

*Arthromacra decora* (Marseul, 1876) **UPOL ZL0052** missing FJ903704 missing FJ903985 missing FJ903836 missing FJ903793 - n/a -

Genus *Cerogria* Borchmann

*Cerogria bryanti* Borchmann, 1925 **UPOL ZL0011** missing FJ903687 missing FJ903962 missing FJ903810 missing EF209951 - n/a -

Genus *Lagria* Fabricius

*Lagria hirta* (Linnaeus, 1758) **LSOL.00127** KJ002840 missing KJ003113 KJ003260 KJ003497 FJ903805 KJ003393 KJ003609 KJ003751

Genus *Macrolagria* Lewis

*Macrolagria robusticeps* (Lewis, 1895) **UPOL ZL0025** missing missing missing FJ903971 missing FJ903820 missing EF209959 - n/a -

Tribe LUPROPINI Ardoin, 1958

Genus *Lorelus* Sharp

*Lorelus armatus* (Montrouzier, 1860) **LSOL.01294** KJ002841 missing KJ003114 missing KJ003498 missing missing KJ003610 KJ003752

*Lorelus crassicornis* Broun, 1880 **LSOL.01709** KJ002842 KJ003002 KJ003115 KJ003261 KJ003499 missing KJ003394 KJ003611 KJ003753

*Lorelus marensis* Kaszab, 1982 **LSOL.02035** KJ002843 KJ003003 missing KJ003262 missing missing missing KJ003612 - n/a -

*Lorelus occularis* Fauvel, 1904 **LSOL.01134** missing KJ003004 KJ003116 KJ003263 KJ003500 missing missing KJ003613 KJ003754

*Lorelus priscus* Sharp, 1876 **LSOL.01697** KJ002844 KJ003005 KJ003117 KJ003264 KJ003501 missing KJ003395 KJ003614 KJ003755

Subfamily PHRENAPATINAE Solier, 1834

Tribe PENETINI Lacordaire, 1859

Genus *Tagalinus* Kaszab

*Tagalinus kuscheli* Kaszab, 1982 **LSOL.02007** missing missing KJ003118 missing missing missing missing missing KJ003616 - n/a -

*Tagalinus lifuanus* (Montrouzier, 1860) **LSOL.02023** missing missing KJ003119 missing KJ003502 missing missing missing KJ003617 - n/a -

*Tagalinus* sp. **LSOL.02212** KJ002846 KJ003006 KJ003120 KJ003265 KJ003503 missing KJ003397 KJ003618 KJ003757

Subfamily PIMELIINAE Latreille, 1802

Tribe ADESMIINI Lacordaire, 1859

Genus *Adesmia* Fischer

*Adesmia boyeri* Solier, 1835 **LSOL.00078** KJ002847 missing KJ003121 KJ003266 KJ003504 missing missing KJ003619 KJ003758

Tribe AKIDINI Billberg, 1820

|                                                   |              |          |          |          |          |          |          |          |          |          |
|---------------------------------------------------|--------------|----------|----------|----------|----------|----------|----------|----------|----------|----------|
| Genus <i>Akis</i> Herbst                          |              |          |          |          |          |          |          |          |          |          |
| <i>Akis bacarozzo</i> (Schrank, 1786)             | LSOL.Ak.3.2  | KJ002848 | KJ003007 | KJ003122 | KJ003267 | missing  | missing  | missing  | missing  | - n/a -  |
| <i>Akis genei</i> Solier, 1837                    | LSOL Ak.5.1  | KJ002849 | KJ003008 | KJ003123 | KJ003268 | missing  | missing  | missing  | missing  | - n/a -  |
| <i>Akis italica</i> Solier, 1837                  | LSOL Ak.6.1  | KJ002850 | KJ003009 | KJ003124 | KJ003269 | missing  | missing  | missing  | missing  | - n/a -  |
| <i>Akis spinosa</i> (Linnaeus, 1764)              | LSOL Ak.4.1  | KJ002851 | KJ003010 | KJ003125 | KJ003270 | missing  | missing  | missing  | missing  | - n/a -  |
| <i>Akis tingitana</i> Lucas, 1859                 | LSOL Ak.9.1  | KJ002852 | KJ003011 | KJ003126 | KJ003271 | missing  | missing  | missing  | missing  | - n/a -  |
| <i>Akis trilineata</i> Herbst, 1799               | LSOL Ak.7.1  | KJ002853 | KJ003012 | missing  | KJ003272 | missing  | missing  | missing  | missing  | - n/a -  |
| Genus <i>Cyphogenia</i> Solier                    |              |          |          |          |          |          |          |          |          |          |
| <i>Cyphogenia chinensis</i> Faldermann, 1835      | none         | missing  | AY663866 | missing  | missing  | missing  | missing  | missing  | AY663859 | - n/a -  |
| Genus <i>Morica</i> Solier                        |              |          |          |          |          |          |          |          |          |          |
| <i>Morica grossa</i> (Linnaeus, 1767)             | LSOL.00004   | KJ002854 | missing  | KJ003127 | KJ003273 | KJ003505 | missing  | KJ003398 | KJ003620 | KJ003759 |
| Tribe ASIDINI Fleming, 1821                       |              |          |          |          |          |          |          |          |          |          |
| Genus <i>Asida</i> Latreille                      |              |          |          |          |          |          |          |          |          |          |
| <i>Asida carinata carinata</i> Solier, 1836       | LSOL.00007   | KJ002855 | missing  | KJ003128 | KJ003274 | missing  | missing  | KJ003399 | KJ003621 | KJ003760 |
| <i>Asida carinata lepidoptera</i> Allard, 1869    | LSOL.00012   | KJ002859 | missing  | KJ003132 | KJ003278 | KJ003508 | missing  | KJ003403 | KJ003624 | KJ003763 |
| <i>Asida consanguinea</i> Allard, 1869            | LSOL.00076   | KJ002856 | missing  | KJ003129 | KJ003275 | KJ003506 | missing  | KJ003400 | missing  | - n/a -  |
| <i>Asida corsica</i> Laporte de Castelnau, 1833   | LSOL.00009   | KJ002857 | missing  | KJ003130 | KJ003276 | missing  | missing  | KJ003401 | KJ003622 | KJ003761 |
| <i>Asida jurinei jurinei</i> Solier, 1836         | LSOL.00011   | KJ002858 | missing  | KJ003131 | KJ003277 | KJ003507 | missing  | KJ003402 | KJ003623 | KJ003762 |
| <i>Asida jurinei pyrenaica</i> Baudi, 1875        | LSOL.00017   | KJ002860 | missing  | KJ003133 | KJ003279 | missing  | missing  | KJ003404 | KJ003625 | KJ003764 |
| <i>Asida sabulosa</i> (Fuessly, 1775)             | LSOL.00020   | KJ002861 | missing  | KJ003134 | KJ003280 | KJ003509 | missing  | KJ003405 | KJ003626 | KJ003765 |
| <i>Asida schusteri</i> Reitter, 1917              | LSOL.00022   | KJ002862 | missing  | KJ003135 | KJ003281 | missing  | missing  | KJ003406 | KJ003627 | KJ003766 |
| <i>Asida sericea</i> (Olivier, 1795)              | LSOL.00024   | KJ002863 | missing  | KJ003136 | KJ003282 | missing  | missing  | KJ003407 | missing  | - n/a -  |
| Tribe ELENOPHORINI Solier, 1837                   |              |          |          |          |          |          |          |          |          |          |
| Genus <i>Leptoderis</i> Billberg                  |              |          |          |          |          |          |          |          |          |          |
| <i>Leptoderis collaris</i> (Linnaeus, 1767)       | LSOL.00034   | KJ002864 | missing  | KJ003137 | KJ003283 | missing  | missing  | KJ003408 | KJ003628 | KJ003767 |
| Genus <i>Psammetichus</i> Latreille               |              |          |          |          |          |          |          |          |          |          |
| <i>Psammetichus crassicornis</i> Waterhouse, 1844 | LSOL.00137   | KJ002865 | KJ003013 | KJ003138 | KJ003284 | missing  | missing  | missing  | KJ003629 | KJ003768 |
| Tribe ERODIINI Billberg, 1820                     |              |          |          |          |          |          |          |          |          |          |
| Genus <i>Erodium</i> Fabricius                    |              |          |          |          |          |          |          |          |          |          |
| <i>Erodium emondi</i> Brullé, 1832                | LSOL.00089   | KJ002866 | missing  | missing  | KJ003285 | KJ003510 | missing  | KJ003409 | KJ003630 | KJ003769 |
| <i>Erodium orientalis</i> Solier, 1834            | multiple ind | missing  | missing  | missing  | FN544375 | missing  | missing  | missing  | JN619059 | - n/a -  |
| Tribe PIMELIINI Latreille, 1802                   |              |          |          |          |          |          |          |          |          |          |
| Genus <i>Pimelia</i> Fabricius                    |              |          |          |          |          |          |          |          |          |          |
| <i>Pimelia atlantis atlantis</i> Solier, 1836     | none         | missing  | AJ566062 | missing  | AJ248202 | missing  | AJ565956 | missing  | missing  | - n/a -  |
| <i>Pimelia atlantis frigioides</i> Koch, 1941     | none         | missing  | AJ566059 | AJ565989 | AJ248199 | missing  | AJ565953 | missing  | missing  | - n/a -  |
| <i>Pimelia baetica</i> Solier, 1836               | none         | missing  | AJ566067 | AJ565996 | AJ248206 | missing  | AJ565961 | missing  | missing  | - n/a -  |
| <i>Pimelia boyeri</i> Solier, 1836                | none         | missing  | AJ566060 | AJ565990 | AJ248200 | missing  | AJ565954 | missing  | missing  | - n/a -  |

|                                                      |               |          |          |          |          |          |          |          |          |          |
|------------------------------------------------------|---------------|----------|----------|----------|----------|----------|----------|----------|----------|----------|
| <i>Pimelia canariensis</i> Brullé, 1838              | multiple ind. | missing  | AJ566049 | AJ565979 | X97209   | missing  | AJ565943 | missing  | missing  | - n/a -  |
| <i>Pimelia cordata</i> Kraatz, 1865                  | none          | missing  | AJ566077 | AJ566006 | AJ248216 | missing  | AJ565971 | missing  | missing  | - n/a -  |
| <i>Pimelia criba</i> Solier, 1836                    | multiple ind. | missing  | AJ566065 | AJ565994 | X97222   | missing  | AJ565959 | missing  | missing  | - n/a -  |
| <i>Pimelia echidna</i> Fairmaire, 1875               | none          | missing  | AJ566076 | AJ566005 | AJ248215 | missing  | AJ565970 | missing  | missing  | - n/a -  |
| <i>Pimelia elevata</i> Sénac, 1887                   | none          | missing  | AJ566066 | AJ565995 | AJ248205 | missing  | AJ565960 | missing  | missing  | - n/a -  |
| <i>Pimelia estevezi</i> Oromi, 1990                  | multiple ind. | missing  | AJ566054 | AJ565984 | X97210   | missing  | AJ565948 | missing  | missing  | - n/a -  |
| <i>Pimelia fernandezlopezi</i> Machado, 1979         | multiple ind. | missing  | AJ566055 | AJ565985 | X97211   | missing  | AJ565949 | missing  | missing  | - n/a -  |
| <i>Pimelia fornicata</i> Herbst, 1799                | none          | missing  | AJ566074 | AJ566003 | AJ248213 | missing  | AJ565968 | missing  | missing  | - n/a -  |
| <i>Pimelia granulicollis</i> Wollaston, 1864         | multiple ind. | missing  | AJ566053 | AJ565983 | X97212   | missing  | AJ565947 | missing  | missing  | - n/a -  |
| <i>Pimelia integra</i> Rosenhauer, 1856              | none          | missing  | AJ566069 | AJ565998 | AJ248208 | missing  | AJ565963 | missing  | missing  | - n/a -  |
| <i>Pimelia interjecta</i> Solier, 1836               | multiple ind. | KJ002867 | KJ003014 | KJ003139 | KJ003286 | KJ003511 | AJ565958 | KJ003410 | KJ003631 | KJ003770 |
| <i>Pimelia laevigata costipennis</i> Wollaston, 1864 | multiple ind. | missing  | AJ566056 | AJ565986 | X972213  | missing  | AJ565950 | missing  | missing  | - n/a -  |
| <i>Pimelia laevigata laevigata</i> Brullé, 1838      | multiple ind. | missing  | AJ566057 | AJ565987 | X972214  | missing  | AJ565951 | missing  | missing  | - n/a -  |
| <i>Pimelia laevigata validipes</i> Wollaston, 1864   | multiple ind. | missing  | AJ566058 | AJ565988 | X972215  | missing  | AJ565952 | missing  | missing  | - n/a -  |
| <i>Pimelia lutaria</i> Brullé, 1838                  | none          | missing  | AJ566045 | AJ565975 | X972216  | missing  | AJ565939 | missing  | missing  | - n/a -  |
| <i>Pimelia maura</i> Solier, 1836                    | none          | missing  | AJ566063 | AJ565992 | AJ248203 | missing  | AJ565957 | missing  | missing  | - n/a -  |
| <i>Pimelia mauritanica bletoni</i> Antoine, 1949     | none          | missing  | AJ566061 | AJ565991 | AJ248201 | missing  | AJ565955 | missing  | missing  | - n/a -  |
| <i>Pimelia monticola</i> Rosenhauer, 1856            | none          | missing  | AJ566071 | AJ566000 | AJ248210 | missing  | AJ565965 | missing  | missing  | - n/a -  |
| <i>Pimelia radula ascendens</i> Wollaston, 1864      | multiple ind. | missing  | AJ566048 | AJ565978 | X97217   | missing  | AJ565942 | missing  | missing  | - n/a -  |
| <i>Pimelia radula granulata</i> Wollaston, 1864      | multiple ind. | missing  | AJ566046 | AJ565976 | X97218   | missing  | AJ565940 | missing  | missing  | - n/a -  |
| <i>Pimelia radula radula</i> Solier, 1836            | none          | missing  | AJ566047 | AJ565977 | AJ248198 | missing  | AJ565941 | missing  | missing  | - n/a -  |
| <i>Pimelia rotundipennis</i> Kraatz, 1865            | none          | missing  | AJ566073 | AJ566002 | AJ248212 | missing  | AJ565967 | missing  | missing  | - n/a -  |
| <i>Pimelia rugosa</i> Fabricius, 1792                | none          | missing  | AJ566075 | AJ566004 | AJ248214 | missing  | AJ565969 | missing  | missing  | - n/a -  |
| <i>Pimelia scabrosa</i> Solier, 1836                 | none          | missing  | AJ566072 | AJ566001 | AJ248211 | missing  | AJ565966 | missing  | missing  | - n/a -  |
| <i>Pimelia sparsa albohumeralis</i> Lindberg, 1950   | multiple ind. | missing  | AJ566051 | AJ565981 | X97219   | missing  | AJ565945 | missing  | missing  | - n/a -  |
| <i>Pimelia sparsa serrimargo</i> Wollaston, 1864     | multiple ind. | missing  | AJ566052 | AJ565982 | X97220   | missing  | AJ565946 | missing  | missing  | - n/a -  |
| <i>Pimelia sparsa sparsa</i> Brullé, 1838            | multiple ind. | missing  | AJ566050 | AJ565980 | X97221   | missing  | AJ565944 | missing  | missing  | - n/a -  |
| <i>Pimelia subglobosa</i> (Pallas, 1781)             | BMNH 829886   | missing  | FN392039 | missing  | FN391481 | missing  | FN392096 | missing  | missing  | - n/a -  |
| Genus <i>Mantichorula</i> Reitter                    |               |          |          |          |          |          |          |          |          |          |
| <i>Mantichorula semenowi</i> Reitter, 1889           | none          | missing  | AY663885 | missing  | missing  | missing  | missing  | missing  | AY663857 | - n/a -  |
| Genus <i>Thriptera</i> Solier                        |               |          |          |          |          |          |          |          |          |          |
| <i>Thriptera kraatzii</i> Haag-Rutenberg, 1876       | LSOL.00134    | KJ002868 | missing  | KJ003140 | KJ003287 | missing  | missing  | missing  | KJ003632 | KJ003771 |
| Tribe Tentyriini Eschscholtz, 1831                   |               |          |          |          |          |          |          |          |          |          |
| Genus <i>Anatolica</i> Eschscholtz                   |               |          |          |          |          |          |          |          |          |          |
| <i>Anatolica potanini</i> Reitter, 1889              | multiple ind. | missing  | AY663868 | EU250298 | missing  | missing  | missing  | missing  | missing  | - n/a -  |
| Genus <i>Dailognatha</i> Eschscholtz                 |               |          |          |          |          |          |          |          |          |          |
| <i>Dailognatha hellenica</i> Reitter, 1897           | BMNH 723106   | missing  | FN392001 | missing  | FM876324 | missing  | FN392058 | missing  | missing  | - n/a -  |
| <i>Dailognatha quadricollis</i> (Brullé, 1832)       | BMNH 749038   | missing  | FN392005 | missing  | FM876453 | missing  | FN392063 | missing  | missing  | - n/a -  |
| Genus <i>Mesostena</i> Eschscholtz                   |               |          |          |          |          |          |          |          |          |          |
| <i>Mesostena angulata</i> (Fabricius, 1775)          | LSOL.00060    | KJ002869 | missing  | KJ003141 | KJ003288 | KJ003512 | missing  | KJ003411 | KJ003633 | KJ003772 |



|                                                   |                     |          |          |          |          |          |          |          |          |          |
|---------------------------------------------------|---------------------|----------|----------|----------|----------|----------|----------|----------|----------|----------|
| <i>Tetragonomenes ruficornis</i> (Champion, 1894) | <b>LSOL.01669</b>   | KJ002893 | KJ003032 | KJ003163 | KJ003309 | KJ003527 | missing  | KJ003429 | KJ003655 | KJ003790 |
| Genus <i>Thesilea</i> Haag-Rutenberg              |                     |          |          |          |          |          |          |          |          |          |
| <i>Thesilea baladica</i> (Montrouzier, 1860)      | <b>LSOL.01932</b>   | KJ002894 | missing  | missing  | missing  | missing  | missing  | missing  | missing  | - n/a -  |
| Tribe STENOCHIINI Kirby, 1837                     |                     |          |          |          |          |          |          |          |          |          |
| Genus <i>Strongylium</i> Kirby                    |                     |          |          |          |          |          |          |          |          |          |
| <i>Strongylium</i> sp.                            | <b>YY-2004</b>      | missing  | missing  | missing  | AY663875 | missing  | missing  | missing  | AY663864 | - n/a -  |
| Subfamily TENEBRIONINAE Latreille, 1802           |                     |          |          |          |          |          |          |          |          |          |
| Tribe AMARYGMINI Gistel, 1848                     |                     |          |          |          |          |          |          |          |          |          |
| Genus <i>Amarygmus</i> Dalman                     |                     |          |          |          |          |          |          |          |          |          |
| <i>Amarygmus tristis</i> Blackburn, 1893          | <b>LSOL.01706</b>   | KJ002898 | KJ003036 | KJ003167 | KJ003311 | KJ003530 | missing  | KJ003430 | KJ003659 | KJ003794 |
| <i>Amarygmus</i> sp. 1                            | <b>LSOL.01640</b>   | KJ002896 | KJ003034 | KJ003165 | missing  | missing  | missing  | missing  | KJ003657 | KJ003792 |
| <i>Amarygmus</i> sp. 2                            | <b>LSOL.01674</b>   | KJ002897 | KJ003035 | KJ003166 | missing  | KJ003529 | missing  | missing  | KJ003658 | KJ003793 |
| <i>Amarygmus</i> pr. <i>tristis</i>               | <b>LSOL.01725</b>   | KJ002895 | KJ003033 | KJ003164 | KJ003310 | KJ003528 | missing  | missing  | KJ003656 | KJ003791 |
| Tribe BLAPTINI Leach, 1815                        |                     |          |          |          |          |          |          |          |          |          |
| Genus <i>Blaps</i> Fabricius                      |                     |          |          |          |          |          |          |          |          |          |
| <i>Blaps alternans</i> Brullé, 1838               | <b>LSOL.BI.56.1</b> | KC160416 | missing  | KC160330 | missing  | missing  | missing  | missing  | missing  | - n/a -  |
| <i>Blaps emondi</i> Solier, 1848                  | <b>LSOL.BI.62.1</b> | KJ002899 | KJ003037 | KJ003168 | KJ003312 | missing  | missing  | missing  | missing  | - n/a -  |
| <i>Blaps gibba</i> Laporte de Castelneau, 1840    | <b>LSOL.BI.06.2</b> | KJ002900 | KJ003038 | missing  | KJ003313 | missing  | KJ003371 | missing  | missing  | - n/a -  |
| <i>Blaps gigas</i> (Linnaeus, 1767)               | <b>LSOL.00029</b>   | KJ002901 | KJ003039 | KJ003169 | KJ003314 | KJ003531 | missing  | KJ003431 | KJ003660 | KJ003795 |
| <i>Blaps jeannei</i> Ferrer & Soldati, 1999       | <b>LSOL.BI.53.1</b> | KJ002902 | missing  | KJ003170 | KJ003315 | missing  | missing  | missing  | missing  | - n/a -  |
| <i>Blaps kollarii</i> Seidlitz, 1893              | <b>LSOL.00114</b>   | KJ002903 | missing  | KJ003171 | KJ003316 | missing  | missing  | KJ003432 | KJ00661  | KJ003796 |
| <i>Blaps lethifera</i> Marsham, 1802              | <b>LSOL.BI.55.1</b> | KC160415 | missing  | KC160329 | KC160259 | missing  | missing  | missing  | missing  | - n/a -  |
| <i>Blaps lusitanica</i> Herbst, 1799              | <b>LSOL.BI.38.2</b> | KJ002904 | missing  | KJ003172 | KJ003317 | missing  | KJ003372 | missing  | missing  | - n/a -  |
| <i>Blaps magica</i> Erichson, 1841                | <b>LSOL.BI.25.1</b> | missing  | missing  | missing  | missing  | missing  | KJ003373 | missing  | missing  | - n/a -  |
| <i>Blaps megalatlantica</i> Koch, 1944            | <b>LSOL.BI.03.1</b> | KC160352 | missing  | KC160277 | KC160219 | missing  | missing  | missing  | missing  | - n/a -  |
| <i>Blaps mucronata</i> Latreille, 1804            | <b>LSOL.00030</b>   | KJ002905 | missing  | KJ003173 | KJ003318 | missing  | missing  | missing  | KJ003662 | KJ003797 |
| <i>Blaps nefraouensis vespertina</i> Koch, 1937   | <b>LSOL.BI.49.1</b> | KJ002906 | missing  | KJ003174 | KJ003319 | missing  | KJ003374 | missing  | missing  | - n/a -  |
| <i>Blaps nitens</i> Laporte de Castelneau, 1840   | <b>LSOL.00031</b>   | KJ002907 | missing  | KJ003175 | KJ003320 | KJ003532 | missing  | KJ003433 | KJ003663 | - n/a -  |
| <i>Blaps ocreata</i> Allard, 1880                 | <b>LSOL.BI.54.1</b> | KC160414 | missing  | KC160328 | missing  | missing  | missing  | missing  | missing  | - n/a -  |
| <i>Blaps peyerimhoffi</i> Koch, 1944              | <b>LSOL.BI.02.1</b> | KC160350 | KC160428 | KC160276 | KC160217 | missing  | missing  | missing  | missing  | - n/a -  |
| <i>Blaps plana</i> Solier, 1848                   | <b>LSOL.BI.25.1</b> | KC160389 | KC160443 | KC160304 | KC160241 | missing  | missing  | missing  | missing  | - n/a -  |
| <i>Blaps propheta propheta</i> Reiche, 1861       | <b>LSOL.BI.07.1</b> | KC160360 | missing  | KC160282 | KC160227 | missing  | missing  | missing  | missing  | - n/a -  |
| <i>Blaps tibialis</i> Reiche & Saulcy, 1857       | <b>LSOL.BI.40.1</b> | KJ002908 | missing  | KJ003176 | KJ003321 | missing  | missing  | missing  | missing  | - n/a -  |
| Tribe BOLITOPHAGINI Kirby, 1837                   |                     |          |          |          |          |          |          |          |          |          |
| Genus <i>Bolitophagus</i> Illiger                 |                     |          |          |          |          |          |          |          |          |          |
| <i>Bolitophagus corticola</i> Say, 1825           | <b>none</b>         | missing  | missing  | missing  | missing  | FJ000417 | missing  | missing  | missing  | - n/a -  |

|                                                             |                   |          |          |          |          |          |         |          |          |          |
|-------------------------------------------------------------|-------------------|----------|----------|----------|----------|----------|---------|----------|----------|----------|
| <i>Bolitophagus reticulatus</i> (Linnaeus, 1767)            | <b>LSOL.00058</b> | KJ002909 | missing  | KJ003177 | KJ003322 | KJ003533 | missing | KJ003434 | KJ003664 | KJ003798 |
| Genus <i>Eledonoprius</i> Reitter                           |                   |          |          |          |          |          |         |          |          |          |
| <i>Eledonoprius armatus</i> (Panzer, 1799)                  | <b>LSOL.00069</b> | KJ002910 | missing  | KJ003178 | KJ003323 | KJ003534 | missing | KJ003435 | KJ003665 | KJ003799 |
| Tribe HELEINI Fleming, 1821                                 |                   |          |          |          |          |          |         |          |          |          |
| Genus <i>Bassianus</i> Matthews & Doyen                     |                   |          |          |          |          |          |         |          |          |          |
| <i>Bassianus sydneyanus</i> (Blackburn, 1893)               | <b>LSOL.01653</b> | KJ002911 | KJ003040 | KJ003179 | KJ003324 | KJ003535 | missing | missing  | KJ003666 | KJ003800 |
| Genus <i>Lepispilus</i> Westwood                            |                   |          |          |          |          |          |         |          |          |          |
| <i>Lepispilus ocellularis</i> Carter, 1932                  | <b>LSOL.01676</b> | KJ002912 | KJ003041 | KJ003180 | KJ003325 | KJ003536 | missing | KJ003436 | KJ003667 | KJ003801 |
| <i>Lepispilus sulcicollis</i> (Boisduval, 1835)             | <b>LSOL.01651</b> | KJ002914 | KJ003043 | KJ003182 | missing  | missing  | missing | KJ003438 | KJ003669 | KJ003803 |
| <i>Lepispilus pr. sulcicollis</i> (Boisduval, 1835)         | <b>LSOL.01654</b> | KJ002913 | KJ003042 | KJ003181 | missing  | KJ003537 | missing | KJ003437 | KJ003668 | KJ003802 |
| Genus <i>Meneristes</i> Pascoe                              |                   |          |          |          |          |          |         |          |          |          |
| <i>Meneristes australis</i> (Boisduval, 1835)               | <b>LSOL.01647</b> | KJ002915 | KJ003044 | KJ003183 | KJ003326 | KJ003538 | missing | KJ003439 | KJ003670 | KJ003804 |
| Genus <i>Mimopeus</i> Pascoe                                |                   |          |          |          |          |          |         |          |          |          |
| <i>Mimopeus elongatus</i> (Breme, 1842)                     | <b>LSOL.01702</b> | KJ002916 | KJ003045 | KJ003184 | missing  | KJ003539 | missing | KJ003440 | KJ003671 | KJ003805 |
| Tribe HELOPINI Latreille, 1802                              |                   |          |          |          |          |          |         |          |          |          |
| Genus <i>Accanthopus</i> Dejean                             |                   |          |          |          |          |          |         |          |          |          |
| <i>Accanthopus velikensis</i> (Piller & Mitterpacher, 1783) | <b>LSOL.00126</b> | KJ002917 | missing  | KC160266 | KJ003327 | missing  | missing | KJ003441 | missing  | - n/a -  |
| Genus <i>Nalassus</i> Mulsant                               |                   |          |          |          |          |          |         |          |          |          |
| <i>Nalassus dryadophilus</i> (Mulsant, 1854)                | <b>LSOL.00118</b> | KJ002918 | missing  | KC160268 | KJ003328 | KJ003540 | missing | KJ003442 | KJ003672 | KJ003806 |
| <i>Nalassus harpaloides</i> (Küster, 1850)                  | <b>LSOL.00064</b> | KJ002919 | missing  | KC160269 | KJ003329 | KJ003541 | missing | KJ003443 | KJ003673 | KJ003807 |
| Tribe MELANIMOMINI Seidlitz, 1894                           |                   |          |          |          |          |          |         |          |          |          |
| Genus <i>Cheirodes</i> Gené                                 |                   |          |          |          |          |          |         |          |          |          |
| <i>Cheirodes pilosus</i> (Tournier, 1868)                   | <b>LSOL.00062</b> | KJ002920 | missing  | KJ003185 | KJ003330 | KJ003542 | missing | missing  | KJ003674 | KJ003808 |
| Tribe OPATRINI Brullé, 1832                                 |                   |          |          |          |          |          |         |          |          |          |
| Genus <i>Ammobius</i> Guérin-Meneville                      |                   |          |          |          |          |          |         |          |          |          |
| <i>Ammobius rufus</i> (Lucas, 1846)                         | <b>LSOL.00036</b> | KJ002921 | missing  | missing  | missing  | KJ003543 | missing | KJ003444 | KJ003675 | KJ003809 |
| Genus <i>Diphyrhynchus</i> Fairmaire                        |                   |          |          |          |          |          |         |          |          |          |
| <i>Diphyrhynchus</i> sp. 1                                  | <b>LSOL.01905</b> | KJ002922 | missing  | missing  | missing  | KJ003544 | missing | KJ003445 | KJ003676 | KJ003810 |
| <i>Diphyrhynchus</i> sp. 2                                  | <b>LSOL.02003</b> | KJ002923 | missing  | KJ003189 | KJ003331 | missing  | missing | missing  | missing  | - n/a -  |
| Genus <i>Gonocephalum</i> Solier                            |                   |          |          |          |          |          |         |          |          |          |
| <i>Gonocephalum adpressiforme</i> Kaszab, 1951              | <b>LSOL.02092</b> | KJ002924 | KJ003046 | missing  | KJ003332 | missing  | missing | KJ003446 | KJ003677 | KJ003811 |
| <i>Gonocephalum yelamosi</i> Español & Viñolas, 1983        | <b>LSOL.00092</b> | KJ002925 | missing  | KJ003190 | KJ003333 | missing  | missing | missing  | missing  | - n/a -  |
| Genus <i>Opatroides</i> Brullé                              |                   |          |          |          |          |          |         |          |          |          |
| <i>Opatroides punctulatus</i> Brullé, 1832                  | <b>LSOL.00040</b> | KJ002926 | missing  | missing  | KJ003334 | missing  | missing | KJ003447 | KJ003678 | - n/a -  |
| Genus <i>Opatrum</i> Fabricius                              |                   |          |          |          |          |          |         |          |          |          |
| <i>Opatrum sabulosum</i> (Linnaeus, 1760)                   | <b>LSOL.00041</b> | KJ002927 | missing  | KJ003191 | KJ003335 | KJ003545 | missing | KJ003448 | KJ003679 | KJ003812 |

Tribe PEDININI Eschscholtz, 1829

Genus *Allophylax* Bedel

*Allophylax picipes* (Oliver, 1811) LSOL.00065 KJ002928 missing KJ003192 missing KJ003546 missing KJ003449 KJ003680 KJ003813

Genus *Dendarus* Latreille

*Dendarus coarcticollis* (Mulsant, 1854) LSOL.00073 KJ002929 missing KJ003193 KJ003336 KJ003547 missing KJ003450 KJ003681 KJ003814

Genus *Heliopates* Dejean

*Heliopates littoralis* Español, 1958 LSOL.00085 KJ002930 missing KJ003194 KJ003337 missing missing missing KJ003682 KJ003815

Genus *Micrositus* Mulsant & Rey

*Micrositus semicostatus* Mulsant, 1854 LSOL.00032 KJ002931 missing KJ003195 KJ003338 KJ003548 missing KJ003451 KJ003683 KJ003816

Genus *Phylan* Stephens

*Phylan gibbus* (Fabricius, 1775) LSOL.00121 KJ002932 missing KJ003196 KJ003339 missing missing missing missing - n/a -

Tribe SCAURINI Billberg, 1820

Genus *Scaurus* Fabricius

*Scaurus atratus* Fabricius, 1775 LSOL.00081 KJ002933 missing KJ003197 missing KJ003549 missing KJ003452 KJ003684 KJ003817

*Scaurus striatus* Fabricius, 1792 LSOL.00048 KJ002934 missing KJ003198 missing missing missing missing KJ003685 KJ003818

*Scaurus uncinus* (Forster, 1771) LSOL.00049 KJ002935 missing KJ003199 missing KJ003550 missing KJ003453 KJ003686 KJ003819

Tribe TENEBRIONINI Latreille, 1802

Genus *Tenebrio* Linnaeus

*Tenebrio molitor* Linnaeus, 1758 multiple ind. missing AJ438153 missing EU048284 EU048308 EU048308 EU048300 X07801 - n/a -

Tribe TITANINI Fauvel, 1905

Genus *Artystona* Bates

*Artystona rugiceps* Bates, 1874 LSOL.01718 KJ002936 missing KJ003200 missing missing missing KJ003454 KJ003687 - n/a -

*Artystona* sp. 1 LSOL.01746 KJ002937 KJ003047 KJ003201 KJ003340 missing missing KJ003455 KJ003688 - n/a -

*Artystona* sp. 2 LSOL.01768 KJ002938 KJ003048 KJ003202 KJ003341 missing missing KJ003456 KJ003689 - n/a -

Genus *Callismilax* Bates

*Callismilax aenea* (Montrouzier, 1860) LSOL.01281 KJ002939 KJ003049 KJ003203 KJ003342 KJ003551 missing KJ003457 KJ003690 KJ003820

*Callismilax auripennis* Fauvel, 1905 LSOL.01604 KJ002940 KJ003050 KJ003204 KJ003343 missing missing KJ003458 KJ003691 KJ003821

*Callismilax bavayi* Fauvel, 1905 LSOL.01432 KJ002941 KJ003051 KJ003205 KJ003344 KJ003552 missing KJ003459 KJ003692 - n/a -

*Callismilax deplanchei* (Fauvel, 1868) LSOL.01224 KJ002942 KJ003052 KJ003206 KJ003345 KJ003553 missing KJ003460 KJ003693 - n/a -

*Callismilax gloriosa* Fauvel, 1905 LSOL.02252 KJ002943 KJ003053 KJ003207 KJ003346 KJ003554 missing KJ003461 KJ003694 KJ003822

*Callismilax plicicollis* Fauvel, 1905 LSOL.01546 KJ002944 KJ003054 KJ003208 KJ003347 KJ003555 missing KJ003462 KJ003695 KJ003823

*Callismilax sarasini* Kaszab, 1982 LSOL.01289 KJ002946 KJ003056 KJ003210 KJ003349 KJ003556 missing KJ003464 KJ003697 - n/a -

*Callismilax sulcipennis* Fauvel, 1905 LSOL.01237 KJ002947 KJ003057 KJ003211 KJ003350 KJ003557 missing KJ003465 KJ003698 - n/a -

*Callismilax variolosa* Fauvel, 1905 LSOL.01515 KJ002948 KJ003058 KJ003212 KJ003351 KJ003558 missing KJ003466 KJ003699 KJ003825

*Callismilax* pr. *ruficornis* Bates, 1874 LSOL.01500 KJ002945 KJ003055 KJ003029 KJ003348 missing missing KJ003463 KJ003696 KJ003824

Genus *Cerodolus* Sharp

*Cerodolus chrysomeloides* Sharp, 1886 LSOL.01762 KJ002949 KJ003059 KJ003213 KJ003352 KJ003559 missing KJ003467 KJ003700 - n/a -

Tribe TOXICINI Lacordaire, 1859

Genus *Calymmus* Montrouzier

*Calymmus berardi* (Montrouzier, 1860) **LSOL.01796** KJ002950 missing KJ003214 missing missing missing missing missing missing - n/a -

Tribe TRIBOLIINI Gistel, 1848

Genus *Tribolium* MacLeay

*Tribolium castaneum* (Herbst, 1797) **multiple ind.** AJ312413 KJ003060 KJ003215 KJ003353 KJ003560 KJ003375 KJ003468 KJ003701 KJ003826

*Tribolium confusum* Jacquelin du Val, 1861 **multiple ind.** missing EU048288 missing FJ743725 EU048304 EU048304 EU048296 missing - n/a -

Tribe ULOMINI Blanchard, 1845

Genus *Achthosus* Pascoe

*Achthosus westwoodi* Pascoe, 1863 **LSOL.01625** KJ002952 KJ003061 KJ003216 KJ003354 KJ003561 missing KJ003469 KJ003702 - n/a -

Genus *Uloma* Dejean

*Uloma apicipennis* (Fauvel, 1904) **LSOL.02248** KJ002953 KJ003062 KJ003217 missing KJ003562 missing missing KJ003703 - n/a -

*Uloma cavicollis* Blair, 1940 **LSOL.00996** KJ002955 KJ003064 KJ003219 KJ003356 KJ003564 missing KJ003471 KJ003705 KJ003829

*Uloma damoiseau* Kaszab, 1982 **LSOL.01048** KJ002956 missing missing KJ003357 missing missing missing missing - n/a -

*Uloma marginatoides* Kaszab, 1982 **LSOL.01646** KJ002960 KJ003067 missing KJ003361 missing missing missing KJ003708 - n/a -

*Uloma microcephala* (Fauvel, 1904) **LSOL.01067** KJ002961 missing missing KJ003362 missing missing missing missing - n/a -

*Uloma miriceps* (Fauvel, 1904) **LSOL.01349** KJ002962 KJ003068 KJ003222 KJ003363 KJ003567 missing missing KJ003709 KJ003832

*Uloma opacipennis* (Fauvel, 1904) **LSOL.02250** KJ002963 KJ003069 KJ003223 KJ003364 KJ003568 missing KJ003473 KJ003710 KJ003833

*Uloma opacoides* Kaszab, 1982 **LSOL.01644** KJ002964 KJ003070 KJ003224 KJ003365 missing missing missing KJ003711 KJ003834

*Uloma punctata* (Fauvel, 1904) **LSOL.01268** KJ002965 KJ003071 KJ003225 KJ003366 KJ003569 missing KJ003474 KJ003712 KJ003835

*Uloma queenslandica* Kaszab, 1982 **LSOL.01643** KJ002966 KJ003072 KJ003226 KJ003367 missing missing missing KJ003713 KJ003836

*Uloma rufa* (Piller & Mitterpacher, 1783) **LSOL.U.rufa** KJ002967 KJ003073 missing missing missing missing missing KJ003714 - n/a -

*Uloma tenebrioides* (White, 1846) **LSOL.01695** KJ002969 KJ003075 missing KJ003369 KJ003571 missing missing KJ003704 - n/a -

*Uloma* sp. 1 **LSOL.01339** KJ002954 KJ003063 KJ003218 KJ003355 KJ003563 missing KJ003470 KJ003716 KJ003828

*Uloma* sp. 2 **LSOL.01337** KJ002957 KJ003065 KJ003220 KJ003358 KJ003565 missing KJ003472 KJ003706 KJ003830

*Uloma* sp. 3 **LSOL.01031** KJ002958 missing missing KJ003359 missing missing missing missing - n/a -

*Uloma* sp. 4 **LSOL.01617** KJ002959 KJ003066 KJ003221 KJ003360 KJ003566 missing missing KJ003707 KJ003831

*Uloma* sp. 5 **LSOL.01673** KJ002968 KJ003074 KJ003227 KJ003368 KJ003570 missing missing KJ003715 KJ003837

INCERTAE SEDIS

Genus *Aptora* Bates

*Aptora rufipes* Bates, 1872 **LSOL.01720** KJ002845 missing missing missing missing missing KJ003396 KJ003615 KJ003756

Family TETRATOMIDAE Billberg, 1820

Genus *Hallomenus* Panzer

*Hallomenus binotatus* (Quensel, 1790) **UPOL ZL0171** missing FJ903764 missing FJ904053 missing FJ903921 missing EF209917 - n/a -

Genus *Holostrophus* xxxx

*Holostrophus orientalis* Lewis, 1795 **UPOL ZL0082** missing FJ903723 missing FJ904006 missing FJ903859 missing EF209905 - n/a -

|                                                   |                    |         |          |         |          |         |          |         |          |         |  |
|---------------------------------------------------|--------------------|---------|----------|---------|----------|---------|----------|---------|----------|---------|--|
| Genus <i>Mycetoma</i> Dejean                      |                    |         |          |         |          |         |          |         |          |         |  |
| <i>Mycetoma suturale</i> (Panzer, 1797)           | <b>UPOL ZL0078</b> | missing | FJ903719 | missing | FJ904002 | missing | FJ903855 | missing | EF209903 | - n/a - |  |
| <i>Mycetoma</i> sp.                               | <b>UPOL ZL0139</b> | missing | FJ903747 | missing | FJ904032 | missing | FJ903897 | missing | EF209909 | - n/a - |  |
| Genus <i>Penthe</i> Newman                        |                    |         |          |         |          |         |          |         |          |         |  |
| <i>Penthe japana</i> Marseul, 1876                | <b>UPOL ZL0026</b> | missing | FJ903694 | missing | FJ903972 | missing | FJ903821 | missing | FJ903789 | - n/a - |  |
| <i>Penthe</i> sp.                                 | <b>UPOL ZL0133</b> | missing | FJ903743 | missing | FJ904028 | missing | FJ903893 | missing | EF209891 | - n/a - |  |
| Genus <i>Synstrophus</i> Seidlitz                 |                    |         |          |         |          |         |          |         |          |         |  |
| <i>Synstrophus macrophthalmus</i> (Reitter, 1887) | <b>UPOL ZL0031</b> | missing | missing  | missing | FJ903977 | missing | FJ903826 | missing | EF209901 | - n/a - |  |

**Family TRICTENOTOMIDAE Blanchard, 1845**

|                                |                    |         |          |         |          |         |          |         |          |         |
|--------------------------------|--------------------|---------|----------|---------|----------|---------|----------|---------|----------|---------|
| Genus <i>Trictenotoma</i> Gray |                    |         |          |         |          |         |          |         |          |         |
| <i>Trictenotoma</i> sp.        | <b>UPOL ZL0208</b> | missing | EF490155 | missing | EF490185 | missing | FJ903945 | missing | EF209990 | - n/a - |

**Family ZOPHERIDAE Solier, 1834**

|                                             |                    |         |          |         |          |         |          |         |          |         |
|---------------------------------------------|--------------------|---------|----------|---------|----------|---------|----------|---------|----------|---------|
| Genus <i>Aulonium</i> Erichson              |                    |         |          |         |          |         |          |         |          |         |
| <i>Aulonium trisulcum</i> (Fourcroy, 1785)  | <b>UPOL 002279</b> | missing | FJ903787 | missing | FJ904080 | missing | FJ903951 | missing | EF209944 | - n/a - |
| Genus <i>Bitoma</i> Herbst                  |                    |         |          |         |          |         |          |         |          |         |
| <i>Bitoma siccana</i> Pascoe, 1863          | <b>UPOL 002219</b> | missing | FJ903786 | missing | FJ904079 | missing | FJ903950 | missing | EF209943 | - n/a - |
| Genus <i>Colydium</i> Fabricius             |                    |         |          |         |          |         |          |         |          |         |
| <i>Colydium elongatum</i> (Fabricius, 1787) | <b>UPOL ZL0195</b> | missing | EF490160 | missing | EF490189 | missing | FJ903934 | missing | missing  | - n/a - |
| Genus <i>Endophloeus</i> Dejean             |                    |         |          |         |          |         |          |         |          |         |
| <i>Endophloeus serratus</i> Sharp, 1885     | <b>UPOL ZL0143</b> | missing | FJ903750 | missing | FJ903035 | missing | FJ903900 | missing | EF209939 | - n/a - |
| Genus <i>Gemphylodes</i> Pascoe             |                    |         |          |         |          |         |          |         |          |         |
| <i>Gemphylodes lewisii</i> Sharp, 1885      | <b>UPOL ZL0067</b> | missing | EF490156 | missing | EF490186 | missing | FJ903848 | missing | EF209938 | - n/a - |
| Genus <i>Synchita</i> Hellwig               |                    |         |          |         |          |         |          |         |          |         |
| <i>Synchita humeralis</i> (Fabricius, 1792) | <b>UPOL ZL0178</b> | missing | FJ903768 | missing | FJ904058 | missing | FJ903925 | missing | EF209940 | - n/a - |

---

\* For 18S, separate accession numbers are provided in case several non-overlapping fragments were sequenced
