# Supplementary material for: Cretaceous environmental changes led to high extinction rates in a hyperdiverse beetle family
Source: PubMed Central journal article supplement (PMC4210489; doi:10.1186/s12862-014-0220-1), 2014-10-21
Supplement: 12862_2014_220_MOESM4_ESM.pdf [file 12862_2014_220_MOESM4_ESM.pdf]

### Additional Table S4

Number of genera per tribe. Sampled tribes are highlighted using bold characters.

| Subfamily     | Tribe               | number of genera |
|---------------|---------------------|------------------|
| Zolodininae   | n/a                 | 2                |
| Lagriinae     | <b>Adeliini</b>     | <b>46</b>        |
|               | Belopini            | 6                |
|               | <b>Chaerodini</b>   | <b>2</b>         |
|               | Cossyphini          | 2                |
|               | Goniaderini         | 21               |
|               | Laenini             | 9                |
|               | <b>Lagriini</b>     | <b>130</b>       |
|               | <b>Lupropini</b>    | <b>12</b>        |
|               | Pycnocerini         | 18               |
| Nilioninae    | n/a                 | 1                |
| Phrenapatinae | Archaeoglenini      | 1                |
|               | <b>Penetini</b>     | <b>24</b>        |
|               | Phrenapatini        | 2                |
| Pimeliinae    | Adelostomini        | 24               |
|               | <b>Adesmiini</b>    | <b>14</b>        |
|               | <b>Akidini</b>      | <b>5</b>         |
|               | Anepsiini           | 5                |
|               | <b>Asidini</b>      | <b>45</b>        |
|               | Boromorphini        | 1                |
|               | Branchini           | 3                |
|               | Caenocrypticini     | 6                |
|               | Ceratanisini        | 3                |
|               | Cnemeplatiini       | 8                |
|               | Cnemodinini         | 1                |
|               | Coniontini          | 4                |
|               | Cossyphodini        | 8                |
|               | Cryptochilini       | 13               |
|               | Cryptoglossini      | 3                |
|               | Edrotini            | 49               |
|               | <b>Elenophorini</b> | <b>3</b>         |
|               | Epitragini          | 29               |
|               | <b>Erodiini</b>     | <b>28</b>        |
|               | Evasiosomini        | 4                |
|               | Falsomycterini      | 2                |
|               | Idisiini            | 1                |
|               | Klewariini          | 1                |

|               |                             |            |
|---------------|-----------------------------|------------|
|               | Kuhitangiini                | 1          |
|               | Lachnogyini                 | 4          |
|               | Leptodini                   | 2          |
|               | Nycteliini                  | 9          |
|               | Nyctoporini                 | 1          |
|               | Phrynocarenini              | 1          |
|               | Physogasterini              | 4          |
|               | <b><i>Pimeliini</i></b>     | <b>67</b>  |
|               | Praociini                   | 9          |
|               | Sepidiini                   | 30         |
|               | Stenosini                   | 28         |
|               | <b><i>Tentyriini</i></b>    | <b>90</b>  |
|               | Thinobatini                 | 2          |
|               | Trilobocarini               | 5          |
|               | Vacronini                   | 4          |
|               | Zophosini                   | 17         |
| Tenebrioninae | Acropteronini               | 2          |
|               | Alphitobiini                | 4          |
|               | <b><i>Amarygmini</i></b>    | <b>58</b>  |
|               | Amphidorini                 | 6          |
|               | Apocryphini                 | 4          |
|               | <b><i>Blaptini</i></b>      | <b>24</b>  |
|               | <b><i>Bolitophagini</i></b> | <b>18</b>  |
|               | Centronopini                | 3          |
|               | Cerenopini                  | 2          |
|               | Dissonomini                 | 2          |
|               | Eulabini                    | 3          |
|               | Falsocossyphini             | 3          |
|               | <b><i>Heleini</i></b>       | <b>39</b>  |
|               | <b><i>Helopini</i></b>      | <b>41</b>  |
|               | Helopinini                  | 15         |
|               | <b><i>Melanimonini</i></b>  | <b>3</b>   |
|               | <b><i>Opatrini</i></b>      | <b>100</b> |
|               | Palorini                    | 11         |
|               | <b><i>Pedinini</i></b>      | <b>74</b>  |
|               | Platyscelidini              | 11         |
|               | Praeugenini                 | 1          |
|               | Rhysopaussini               | 12         |
|               | <b><i>Scaurini</i></b>      | <b>4</b>   |
|               | Scotobiini                  | 5          |
|               | <b><i>Tenebrionini</i></b>  | <b>9</b>   |
|               | <b><i>Titaeini</i></b>      | <b>9</b>   |
|               | <b><i>Toxicini</i></b>      | <b>18</b>  |
|               | <b><i>Triboliini</i></b>    | <b>10</b>  |
|               | <b><i>Ulomini</i></b>       | <b>18</b>  |

|              |                             |            |
|--------------|-----------------------------|------------|
| Alleculinae  | <b><i>Alleculini</i></b>    | <b>96</b>  |
|              | <b><i>Cteniopodini</i></b>  | <b>24</b>  |
| Diaperinae   | <b><i>Crypticini</i></b>    | <b>14</b>  |
|              | <b><i>Diaperini</i></b>     | <b>40</b>  |
|              | Ectychini                   | 2          |
|              | <b><i>Gnathidiini</i></b>   | <b>24</b>  |
|              | <b><i>Hyociini</i></b>      | <b>6</b>   |
|              | Hypophlaeini                | 5          |
|              | Leiochrinini                | 10         |
|              | Myrmechixenini              | 1          |
|              | <b><i>Phaleriini</i></b>    | <b>8</b>   |
|              | <b><i>Scaphidemini</i></b>  | <b>5</b>   |
|              | <b><i>Trachyscelini</i></b> | <b>3</b>   |
| Stenochiinae | <b><i>Cnodalonini</i></b>   | <b>326</b> |
|              | <b><i>Stenochiini</i></b>   | <b>46</b>  |
|              | Talanini                    | 1          |
