# Supplementary material for: Cretaceous environmental changes led to high extinction rates in a hyperdiverse beetle family
Source: PubMed Central journal article supplement (PMC4210489; doi:10.1186/s12862-014-0220-1), 2014-10-21
Supplement: 12862_2014_220_MOESM6_ESM.pdf [file 12862_2014_220_MOESM6_ESM.pdf]

### Additional Table S5

Comparison of age estimates (under either a BD or a Yule model of speciation) between crown calibration and stem calibration scenarios. For all calibration schemes the median ages and 95% HPD are reported. Bold italic fonts are used to highlight age estimates that are contradicted by known fossil evidences (for the stem calibration scenario).

| Node | Clade                         | Model | Crown calibration scenario |                 | Stem calibration scenario |                 |
|------|-------------------------------|-------|----------------------------|-----------------|---------------------------|-----------------|
|      |                               |       | Median                     | 95% HPD         | Median                    | 95% HPD         |
| 1    | Buprestoidea<br>(Buprestidae) | BD    | 131.96                     | 95.58 - 159.96  | 136.40                    | 106.44 - 186.00 |
|      |                               | Yule  | 154.40                     | 118.88 - 176.46 | 146.70                    | 100.69 - 186.97 |
| 2    | Byrrhoidea<br>(Byrrhidae)     | BD    | 130.75                     | 57.81 - 234.13  | 116.41                    | 84.75 - 182.00  |
|      |                               | Yule  | 124.13                     | 71.31 - 186.65  | 105.55                    | 42.84 - 163.08  |
| 3    | Cleroidea                     | BD    | 217.88                     | 185.73 - 235.21 | 213.61                    | 189.36 - 227.31 |
|      |                               | Yule  | 219.66                     | 191.95 - 236.60 | 206.69                    | 186.03 - 225.39 |
| 4    | Chrysomeloidea                | BD    | 156.30                     | 152.04 - 177.51 | <b>141.69</b>             | 129.78 - 157.23 |
|      |                               | Yule  | 155.71                     | 152.00 - 168.20 | <b>139.95</b>             | 116.20 - 153.65 |
| 5    | Curculionoidea                | BD    | 164.18                     | 152.03 - 186.74 | <b>143.42</b>             | 129.15 - 159.33 |
|      |                               | Yule  | 164.71                     | 152.01 - 177.19 | <b>139.33</b>             | 120.81 - 157.06 |
| 6    | Tenebrionoidea                | BD    | 218.46                     | 210.27 - 228.34 | 207.88                    | 200.95 - 215.31 |
|      |                               | Yule  | 220.89                     | 210.68 - 229.83 | 200.49                    | 186.67 - 210.81 |
| 7    | Aderidae                      | BD    | 128.49                     | 120.00 - 142.65 | <b>96.42</b>              | 49.25 - 128.24  |
|      |                               | Yule  | 130.72                     | 120.02 - 142.83 | <b>101.52</b>             | 76.74 - 126.92  |
| 8    | Anthicidae                    | BD    | 138.33                     | 120.01 - 162.72 | <b>111.73</b>             | 90.54 - 136.45  |
|      |                               | Yule  | 136.28                     | 120.00 - 158.92 | <b>103.05</b>             | 75.19 - 122.58  |
| 9    | Ciidae                        | BD    | 144.13                     | 101.99 - 182.42 | 127.47                    | 78.79 - 155.85  |
|      |                               | Yule  | 138.99                     | 93.72 - 182.24  | 136.10                    | 103.05 - 160.27 |
| 10   | Meloidae                      | BD    | 122.49                     | 108.72 - 136.86 | 115.19                    | 100.29 - 128.79 |
|      |                               | Yule  | 127.77                     | 112.40 - 147.30 | 102.34                    | 85.72 - 117.17  |
| 11   | Mordellidae                   | BD    | 152.60                     | 152.03 - 160.35 | <b>108.95</b>             | 97.39 - 119.35  |
|      |                               | Yule  | 152.74                     | 152.00 - 157.72 | <b>115.70</b>             | 106.77 - 125.31 |
| 12   | Mycetophagidae                | BD    | 107.80                     | 90.40 - 129.19  | 96.80                     | 78.80 - 115.41  |
|      |                               | Yule  | 104.30                     | 84.94 - 139.08  | 97.61                     | 81.29 - 116.14  |
| 13   | Oedemeridae                   | BD    | 116.97                     | 95.37 - 146.98  | 122.88                    | 108.55 - 139.09 |
|      |                               | Yule  | 137.42                     | 101.22 - 175.36 | 105.43                    | 78.31 - 123.02  |
| 14   | Pyrochroidae                  | BD    | 127.29                     | 126.00 - 135.38 | <b>68.80</b>              | 53.05 - 89.66   |
|      |                               | Yule  | 127.60                     | 126.00 - 135.56 | <b>64.45</b>              | 50.88 - 82.67   |
| 15   | Tenebrionidae                 | BD    | 178.04                     | 168.40 - 188.71 | 167.58                    | 155.84 - 177.08 |
|      |                               | Yule  | 180.05                     | 169.56 - 191.62 | 165.86                    | 157.47 - 178.15 |
| 16   | Zopheridae                    | BD    | 145.85                     | 122.15 - 175.71 | 141.81                    | 122.50 - 156.66 |
|      |                               | Yule  | 144.65                     | 120.95 - 164.16 | 131.98                    | 115.26 - 156.10 |
| 17   | Alleculinae                   | BD    | 126.82                     | 126.00 - 130.86 | <b>114.36</b>             | 96.74 - 124.92  |
|      |                               | Yule  | 126.83                     | 126.00 - 130.81 | <b>112.61</b>             | 90.63 - 125.61  |
| 18   | Lagriinae                     | BD    | 148.03                     | 138.98 - 154.64 | 142.21                    | 133.76 - 150.93 |
|      |                               | Yule  | 147.10                     | 132.14 - 149.53 | 141.37                    | 134.06 - 148.76 |
| 19   | Pimeliinae /<br>Pimeliini     | BD    | 73.42                      | 59.88 - 97.34   | 71.13                     | 55.65 - 84.99   |
|      |                               | Yule  | 72.44                      | 61.63 - 84.12   | 65.58                     | 55.53 - 79.46   |
| 20   | Pimeliinae / other            | BD    | 146.45                     | 117.91 - 168.19 | 123.25                    | 104.67 - 142.89 |
|      |                               | Yule  | 144.29                     | 116.69 - 171.77 | 128.35                    | 106.01 - 144.98 |

|                            |      |        |                 |        |                 |
|----------------------------|------|--------|-----------------|--------|-----------------|
| 21 Stenochiinae            | BD   | 97.85  | 85.25 - 108.91  | 88.53  | 77.17 - 98.85   |
|                            | Yule | 100.22 | 88.76 - 109.90  | 91.15  | 74.98 - 103.09  |
| 22 Adeliini                | BD   | 91.33  | 80.72 - 105.69  | 90.81  | 78.08 - 105.47  |
|                            | Yule | 95.13  | 82.69 - 113.95  | 78.62  | 64.62 - 92.12   |
| 23 Akiidini                | BD   | 80.97  | 59.60 - 101.78  | 76.35  | 53.07 - 91.25   |
|                            | Yule | 82.49  | 52.03 - 107.92  | 71.11  | 53.88 - 89.11   |
| 24 Asidini                 | BD   | 62.80  | 47.94 - 74.39   | 56.10  | 39.12 - 72.81   |
|                            | Yule | 55.66  | 42.62 - 79.75   | 53.15  | 37.94 - 63.24   |
| 25 Blaptini                | BD   | 68.26  | 53.99 - 79.22   | 62.90  | 42.71 - 74.11   |
|                            | Yule | 64.61  | 50.34 - 75.20   | 57.95  | 46.25 - 68.84   |
| 26 Heleini                 | BD   | 94.46  | 81.94 - 104.39  | 88.78  | 81.39 - 95.08   |
|                            | Yule | 94.53  | 87.38 - 107.20  | 83.21  | 73.71 - 91.19   |
| 27 Lagriini                | BD   | 116.13 | 102.87 - 128.11 | 110.68 | 99.27 - 126.23  |
|                            | Yule | 119.08 | 112.07 - 128.01 | 110.22 | 101.07 - 122.58 |
| 28 Pedinini                | BD   | 99.93  | 77.40 - 117.74  | 97.09  | 81.46 - 110.66  |
|                            | Yule | 102.64 | 81.84 - 115.80  | 89.91  | 76.75 - 102.22  |
| 29 Phaleriini              | BD   | 70.64  | 52.11 - 89.13   | 73.83  | 54.82 - 89.60   |
|                            | Yule | 78.42  | 55.97 - 94.31   | 60.98  | 47.08 - 79.64   |
| 30 Tentyriini              | BD   | 55.05  | 45.09 - 67.74   | 57.68  | 46.19 - 65.02   |
|                            | Yule | 59.33  | 37.83 - 63.89   | 48.85  | 38.48 - 60.53   |
| 31 Titaeini                | BD   | 58.99  | 49.29 - 67.79   | 53.56  | 43.92 - 59.48   |
|                            | Yule | 59.51  | 49.07 - 69.47   | 53.04  | 45.36 - 60.94   |
| 32 Ulomini                 | BD   | 39.40  | 34.66 - 43.14   | 33.77  | 28.14 - 39.00   |
|                            | Yule | 40.97  | 35.58 - 46.27   | 36.02  | 29.98 - 41.84   |
| 33 Canarian <i>Pimelia</i> | BD   | 22.57  | 19.48 - 24.00   | 22.71  | 19.86 - 24.00   |
|                            | Yule | 22.85  | 20.01 - 24.00   | 21.92  | 18.86 - 24.00   |

---
