# Supplementary material for: Cretaceous environmental changes led to high extinction rates in a hyperdiverse beetle family
Source: PubMed Central journal article supplement (PMC4210489; doi:10.1186/s12862-014-0220-1), 2014-10-21
Supplement: 12862_2014_220_MOESM7_ESM.pdf [file 12862_2014_220_MOESM7_ESM.pdf]

### Additional Table S6

Bayes factor scores ( $2 \ln B_F$ ) from comparisons of alternative calibration procedures of BRC analyses.

---

| Calibration procedures | estimated mean $-\ln L$ | vs. BD Stem | vs. BD Crown | vs. Yule Stem | vs. Yule Crown |
|------------------------|-------------------------|-------------|--------------|---------------|----------------|
| BD Stem                | -219453.58              | -           | 90.74        | -7.78         | 13.98          |
| BD Crown               | -219498.95              | -90.74      | -            | -98.52        | -76.76         |
| Yule Stem              | -219449.69              | 7.78        | 98.52        | -             | 21.76          |
| Yule Crown             | -219460.57              | -13.98      | 76.76        | -14.92        | -              |

---

Though the stem calibration procedures are significantly more supported by the  $B_F$  comparisons, the fossil record does not support their age estimates. Out of the two crown calibration procedures, the BD crown is recovered as the best-fit model ( $B_F$ , difference of 76.76, according to the criterion  $2 \ln B_F > 10$  (Kass & Raftery 1995)).
