# Supplementary material for: Cretaceous environmental changes led to high extinction rates in a hyperdiverse beetle family
Source: PubMed Central journal article supplement (PMC4210489; doi:10.1186/s12862-014-0220-1), 2014-10-21

## **Additional figure S2**

Timetree corresponding to the results of the best-fit calibration procedure implemented with BEAST ('Yule crown'). Horizontal bars on nodes correspond to the 95% higher posterior probabilities (HPD) of age estimates.

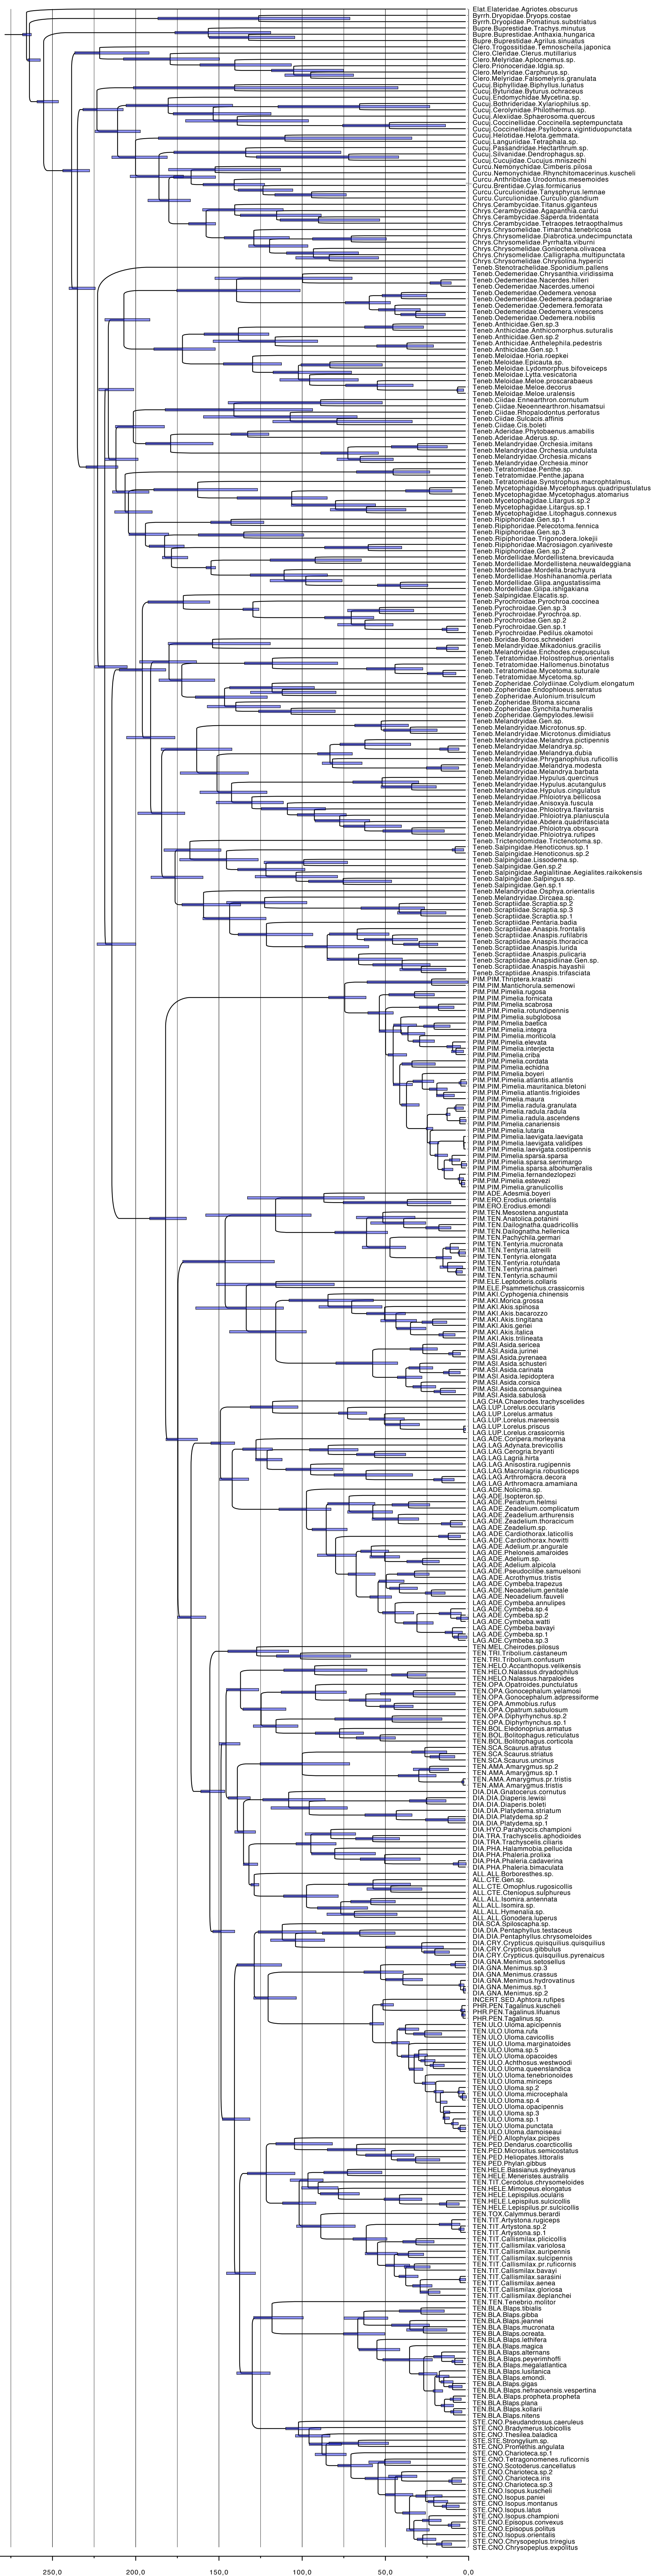

Supplement: 12862_2014_220_MOESM8_ESM.pdf [file 12862_2014_220_MOESM8_ESM.pdf]
