# Supplementary material for: Cretaceous environmental changes led to high extinction rates in a hyperdiverse beetle family
Source: PubMed Central journal article supplement (PMC4210489; doi:10.1186/s12862-014-0220-1), 2014-10-21
Supplement: 12862_2014_220_MOESM10_ESM.pdf [file 12862_2014_220_MOESM10_ESM.pdf]

## Additional Table S7

Biology/habitat of each of the 98 sampled tenebrionid genera.

| Genus               | Systematics               | Biology/Habitat                                   | Coded as           |
|---------------------|---------------------------|---------------------------------------------------|--------------------|
| <i>Borboresthes</i> | Alleculinae, Alleculini   | Open grasslands, temperate forests                | 0 (other)          |
| <i>Gonodera</i>     | Alleculinae, Alleculini   | Open grasslands, temperate forests                | 0 (other)          |
| <i>Hymenalia</i>    | Alleculinae, Alleculini   | Open grasslands, temperate forests                | 0 (other)          |
| <i>Isomira</i>      | Alleculinae, Alleculini   | Open grasslands, temperate forests                | 0 (other)          |
| <i>Cteniopus</i>    | Alleculinae, Cteniopodini | Open grasslands, temperate forests                | 0 (other)          |
| <i>Omophilus</i>    | Alleculinae, Cteniopodini | Open grasslands, temperate forests                | 0 (other)          |
| <i>Crypticus</i>    | Diaperinae, Crypticini    | Arid/semi-arid zones                              | 1 (arid/semi-arid) |
| <i>Diaperis</i>     | Diaperinae, Diaperini     | Temperate forests                                 | 0 (other)          |
| <i>Gnatocerus</i>   | Diaperinae, Diaperini     | Temperate forests                                 | 0 (other)          |
| <i>Pentaphyllus</i> | Diaperinae, Diaperini     | Temperate forests                                 | 0 (other)          |
| <i>Platydema</i>    | Diaperinae, Diaperini     | Temperate/tropical rainforests, temperate forests | 0 (other)          |
| <i>Menimus</i>      | Diaperinae, Gnathidiini   | Temperate/tropical rainforests                    | 0 (other)          |
| <i>Parahyocis</i>   | Diaperinae, Hyociini      | Costal sand areas                                 | 1 (arid/semi-arid) |
| <i>Halammobia</i>   | Diaperinae, Phaleriini    | Costal sand areas                                 | 1 (arid/semi-arid) |
| <i>Phaleria</i>     | Diaperinae, Phaleriini    | Costal sand areas                                 | 1 (arid/semi-arid) |
| <i>Spiloscapa</i>   | Diaperinae, Scaphidemini  | Temperate/tropical rainforests                    | 0 (other)          |
| <i>Trachyscelis</i> | Diaperinae, Trachyscelini | Costal sand areas                                 | 1 (arid/semi-arid) |
| <i>Adelium</i>      | Lagriinae, Adeliini       | Temperate/tropical rainforests                    | 0 (other)          |
| <i>Arcothymus</i>   | Lagriinae, Adeliini       | Temperate/tropical rainforests                    | 0 (other)          |
| <i>Cardiothorax</i> | Lagriinae, Adeliini       | Temperate/tropical rainforests                    | 0 (other)          |
| <i>Coripera</i>     | Lagriinae, Adeliini       | Temperate/tropical rainforests                    | 0 (other)          |
| <i>Cymbeba</i>      | Lagriinae, Adeliini       | Temperate/tropical rainforests                    | 0 (other)          |
| <i>Isopteron</i>    | Lagriinae, Adeliini       | Arid/semi-arid zones                              | 1 (arid/semi-arid) |
| <i>Neoadelium</i>   | Lagriinae, Adeliini       | Temperate/tropical rainforests                    | 0 (other)          |
| <i>Nolicima</i>     | Lagriinae, Adeliini       | Temperate/tropical rainforests                    | 0 (other)          |
| <i>Periatrum</i>    | Lagriinae, Adeliini       | Temperate/tropical rainforests                    | 0 (other)          |
| <i>Pheloneis</i>    | Lagriinae, Adeliini       | Temperate/tropical rainforests                    | 0 (other)          |
| <i>Pseudocilibe</i> | Lagriinae, Adeliini       | Temperate/tropical rainforests                    | 0 (other)          |
| <i>Zeadelium</i>    | Lagriinae, Adeliini       | Temperate/tropical rainforests                    | 0 (other)          |
| <i>Chaerodes</i>    | Lagriinae, Chaerodini     | Costal sand areas                                 | 1 (arid/semi-arid) |
| <i>Adynata</i>      | Lagriinae, Lagriini       | Temperate forests                                 | 0 (other)          |
| <i>Anisostira</i>   | Lagriinae, Lagriini       | Temperate forests                                 | 0 (other)          |
| <i>Arthromacra</i>  | Lagriinae, Lagriini       | Temperate forests                                 | 0 (other)          |
| <i>Cerogria</i>     | Lagriinae, Lagriini       | Temperate forests                                 | 0 (other)          |
| <i>Lagria</i>       | Lagriinae, Lagriini       | Temperate forests                                 | 0 (other)          |
| <i>Macrolagria</i>  | Lagriinae, Lagriini       | Temperate forests                                 | 0 (other)          |
| <i>Lorelus</i>      | Lagriinae, Lupropini      | Temperate/tropical rainforests                    | 0 (other)          |
| <i>Tagalinus</i>    | Phrenapatinae, Penetini   | Temperate/tropical rainforests                    | 0 (other)          |
| <i>Adesmia</i>      | Pimeliinae, Adesmiini     | Arid/semi-arid zones                              | 1 (arid/semi-arid) |
| <i>Akis</i>         | Pimeliinae, Akidini       | Arid/semi-arid zones                              | 1 (arid/semi-arid) |

|                       |                              |                                                   |                    |
|-----------------------|------------------------------|---------------------------------------------------|--------------------|
| <i>Cyphogenia</i>     | Pimeliinae, Akidini          | Arid/semi-arid zones                              | 1 (arid/semi-arid) |
| <i>Morica</i>         | Pimeliinae, Akidini          | Arid/semi-arid zones                              | 1 (arid/semi-arid) |
| <i>Asida</i>          | Pimeliinae, Asidini          | Costal sand areas, arid/semi-arid zones           | 1 (arid/semi-arid) |
| <i>Leptoderis</i>     | Pimeliinae, Elenophorini     | Costal sand areas, arid/semi-arid zones           | 1 (arid/semi-arid) |
| <i>Psammetichus</i>   | Pimeliinae, Elenophorini     | Arid/semi-arid zones                              | 1 (arid/semi-arid) |
| <i>Erodius</i>        | Pimeliinae, Erodiini         | Costal sand areas, arid/semi-arid zones           | 1 (arid/semi-arid) |
| <i>Mantichorula</i>   | Pimeliinae, Pimeliini        | Arid/semi-arid zones                              | 1 (arid/semi-arid) |
| <i>Pimelia</i>        | Pimeliinae, Pimeliini        | Costal sand areas, arid/semi-arid zones           | 1 (arid/semi-arid) |
| <i>Thriptera</i>      | Pimeliinae, Pimeliini        | Arid/semi-arid zones                              | 1 (arid/semi-arid) |
| <i>Anatolica</i>      | Pimeliinae, Tentyriini       | Arid/semi-arid zones                              | 1 (arid/semi-arid) |
| <i>Dailognatha</i>    | Pimeliinae, Tentyriini       | Costal sand areas, arid/semi-arid zones           | 1 (arid/semi-arid) |
| <i>Mesostena</i>      | Pimeliinae, Tentyriini       | Arid/semi-arid zones                              | 1 (arid/semi-arid) |
| <i>Pachychila</i>     | Pimeliinae, Tentyriini       | Costal sand areas, arid/semi-arid zones           | 1 (arid/semi-arid) |
| <i>Tentyria</i>       | Pimeliinae, Tentyriini       | Costal sand areas, arid/semi-arid zones           | 1 (arid/semi-arid) |
| <i>Tentyrina</i>      | Pimeliinae, Tentyriini       | Costal sand areas, arid/semi-arid zones           | 1 (arid/semi-arid) |
| <i>Bradymerus</i>     | Stenochiinae, Cnodalonini    | Temperate/tropical rainforests                    | 0 (other)          |
| <i>Charioteca</i>     | Stenochiinae, Cnodalonini    | Temperate/tropical rainforests                    | 0 (other)          |
| <i>Chlorocamma</i>    | Stenochiinae, Cnodalonini    | Temperate/tropical rainforests                    | 0 (other)          |
| <i>Chrysopeplus</i>   | Stenochiinae, Cnodalonini    | Temperate/tropical rainforests                    | 0 (other)          |
| <i>Episopus</i>       | Stenochiinae, Cnodalonini    | Temperate/tropical rainforests                    | 0 (other)          |
| <i>Isopus</i>         | Stenochiinae, Cnodalonini    | Temperate/tropical rainforests                    | 0 (other)          |
| <i>Promethis</i>      | Stenochiinae, Cnodalonini    | Temperate/tropical rainforests                    | 0 (other)          |
| <i>Pseudandrosus</i>  | Stenochiinae, Cnodalonini    | Temperate/tropical rainforests                    | 0 (other)          |
| <i>Scotoderus</i>     | Stenochiinae, Cnodalonini    | Temperate/tropical rainforests                    | 0 (other)          |
| <i>Tetragonomenes</i> | Stenochiinae, Cnodalonini    | Temperate/tropical rainforests                    | 0 (other)          |
| <i>Thesilea</i>       | Stenochiinae, Cnodalonini    | Temperate/tropical rainforests                    | 0 (other)          |
| <i>Strongylium</i>    | Stenochiinae, Stenochiini    | Temperate/tropical rainforests, temperate forests | 0 (other)          |
| <i>Amarygmus</i>      | Tenebrioninae, Amarygmini    | Temperate/tropical rainforests                    | 0 (other)          |
| <i>Blaps</i>          | Tenebrioninae, Blaptini      | Costal sand areas, arid/semi-arid zones           | 1 (arid/semi-arid) |
| <i>Bolitophagus</i>   | Tenebrioninae, Bolitophagini | Temperate forests                                 | 0 (other)          |
| <i>Eledonoprius</i>   | Tenebrioninae, Bolitophagini | Temperate forests                                 | 0 (other)          |
| <i>Bassianus</i>      | Tenebrioninae, Heleini       | Temperate/tropical rainforests                    | 0 (other)          |
| <i>Lepispilus</i>     | Tenebrioninae, Heleini       | Temperate/tropical rainforests                    | 0 (other)          |
| <i>Meneristes</i>     | Tenebrioninae, Heleini       | Sclerophyll forests                               | 0 (other)          |
| <i>Mimopeus</i>       | Tenebrioninae, Heleini       | Temperate/tropical rainforests                    | 0 (other)          |
| <i>Accanthopus</i>    | Tenebrioninae, Helopini      | Temperate forests                                 | 0 (other)          |
| <i>Nalassus</i>       | Tenebrioninae, Helopini      | Temperate forests                                 | 0 (other)          |
| <i>Cheirodes</i>      | Tenebrioninae, Melanimonini  | Costal sand areas, arid/semi-arid zones           | 1 (arid/semi-arid) |
| <i>Ammobius</i>       | Tenebrioninae, Opatrini      | Costal sand areas                                 | 1 (arid/semi-arid) |
| <i>Diphyrhynchus</i>  | Tenebrioninae, Opatrini      | Costal sand areas                                 | 1 (arid/semi-arid) |
| <i>Gonocephalum</i>   | Tenebrioninae, Opatrini      | Arid/semi-arid zones                              | 1 (arid/semi-arid) |
| <i>Opatroides</i>     | Tenebrioninae, Opatrini      | Costal sand areas, arid/semi-                     | 1 (arid/semi-arid) |

|                    |                             |                                                   |                    |
|--------------------|-----------------------------|---------------------------------------------------|--------------------|
|                    |                             | arid zones                                        |                    |
| <i>Opatrum</i>     | Tenebrioninae, Opatrini     | Costal sand areas, arid/semi-arid zones           | 1 (arid/semi-arid) |
| <i>Allophylax</i>  | Tenebrioninae, Pedinini     | Costal sand areas, arid/semi-arid zones           | 1 (arid/semi-arid) |
| <i>Dendarus</i>    | Tenebrioninae, Pedinini     | Costal sand areas, arid/semi-arid zones           | 1 (arid/semi-arid) |
| <i>Heliopates</i>  | Tenebrioninae, Pedinini     | Costal sand areas                                 | 1 (arid/semi-arid) |
| <i>Micrositus</i>  | Tenebrioninae, Pedinini     | Costal sand areas, arid/semi-arid zones           | 1 (arid/semi-arid) |
| <i>Phylan</i>      | Tenebrioninae, Pedinini     | Costal sand areas, arid/semi-arid zones           | 1 (arid/semi-arid) |
| <i>Scaurus</i>     | Tenebrionini, Scaurini      | Costal sand areas, arid/semi-arid zones           | 1 (arid/semi-arid) |
| <i>Tenebrio</i>    | Tenebrioninae, Tenebrionini | Sclerophyll/temperate forests                     | 0 (other)          |
| <i>Artystona</i>   | Tenebrioninae, Titaeini     | Temperate/tropical rainforests                    | 0 (other)          |
| <i>Callismilax</i> | Tenebrioninae, Titaeini     | Temperate/tropical rainforests                    | 0 (other)          |
| <i>Cerodolus</i>   | Tenebrioninae, Titaeini     | Temperate/tropical rainforests                    | 0 (other)          |
| <i>Tribolium</i>   | Tenebrioninae, Triboliini   | Temperate forests                                 | 0 (other)          |
| <i>Calymmus</i>    | Tenebrioninae, Toxicini     | Temperate/tropical rainforests                    | 0 (other)          |
| <i>Achthosus</i>   | Tenebrioninae, Ulomini      | Temperate/tropical rainforests                    | 0 (other)          |
| <i>Uloma</i>       | Tenebrioninae, Ulomini      | Temperate/tropical rainforests, temperate forests | 0 (other)          |
| <i>Aphthora</i>    | <i>Incertae sedis</i>       | Temperate/tropical rainforests                    | 0 (other)          |
